# Supplementary material
Source: PubMed Central journal article supplement (PMC5691408)
Supplement: AEM.01576-17_zam999118172s1.pdf [file AEM.01576-17_zam999118172s1.pdf]

1 **Supplemental Information for:**  
2 **Alterations in gp37 expand the host range of a T4-like phage**

3 Mianmian Chen, Lei Zhang, Sheikheldin A Abdelgader, Li Yu, Juntian Xu, Huochun Yao,

4 Chengping Lu, Wei Zhang\*

5 College of Veterinary Medicine, Nanjing Agricultural University. Nanjing, Jiangsu Province,  
6 China

7 \*Corresponding authors: College of Veterinary Medicine, Nanjing Agricultural University. No.1  
8 Weigang, Xuanwu District, Nanjing, Jiangsu Province, China. Tel: 86-25-8439 5328, Fax:  
9 86-25-8439 5328, Email: [vszw@njau.edu.cn](mailto:vszw@njau.edu.cn)

10

11 Running title: gp37 replacement expands phage host range

12

13 **Figures**

14 **Figure S1** Electron microscopy images of QL01 and WG01

15 **Figure S2** Phylogenetic trees for the amino acid sequences of gp23 and gp37

16 **Figure S3** Alignment results of gp37 of WG01 with other homologous T4-like phages

17 **Figure S4** Comparison and recombination positions between QL01 and WG01 on  
18 gp37

19 **Figure S5** Growth characteristics of the WG01, QL01, and WG01 derivatives

20 **Tables**

21 **Table S1** strains used in phage isolation and host range analysis of recombinant  
22 phages

23 **Table S2** T4-like phages that show a high homology with the WG01 genome sequence

24 **Table S3** Comparison results for WG01 and QL01

25 **Table S4** The DNA sequences of chimeric phages and mutants from the WQT  
26 chimeric phage

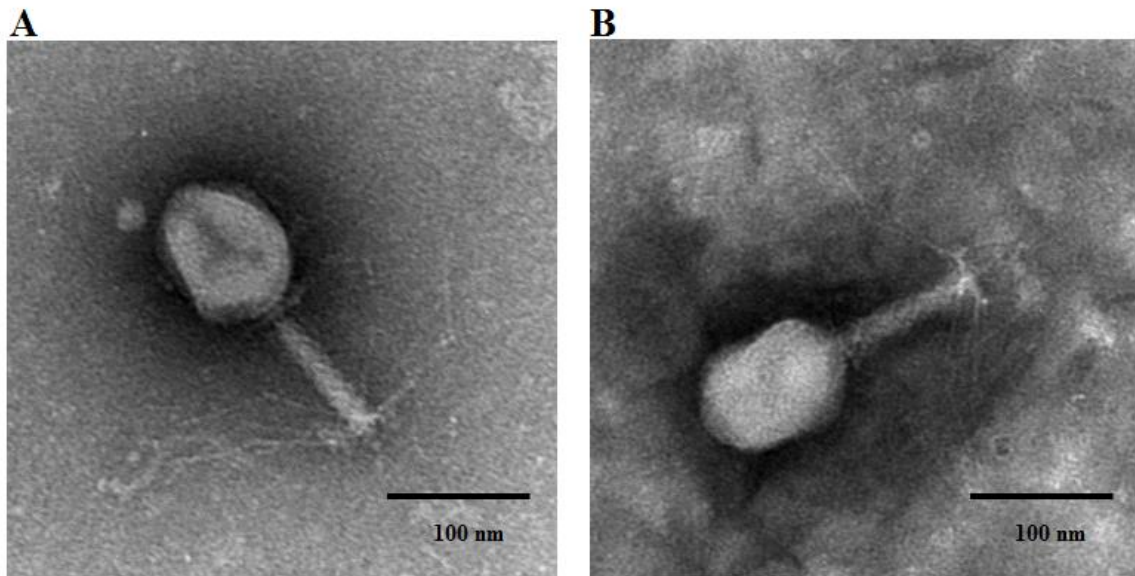

27

28 **Fig. S1 Electron microscopy images of QL01 and WG01**

29 **(A) Electron microscopy image of WG01.**

30 **(B) Electron microscopy image of QL01.**

31 The phage filtrate was applied to a copper grid coated with a carbon support film

32 before negative staining with phosphotungstic acid (PTA, 2% w/v). Electron

33 micrographs were generated with an H\_7650 (Hitachi, Japan) transmission electron

34 microscope (TEM).

35 WG01 possessed an icosahedral head and a contractile tail, which exhibited the same

36 morphology as QL01.

37

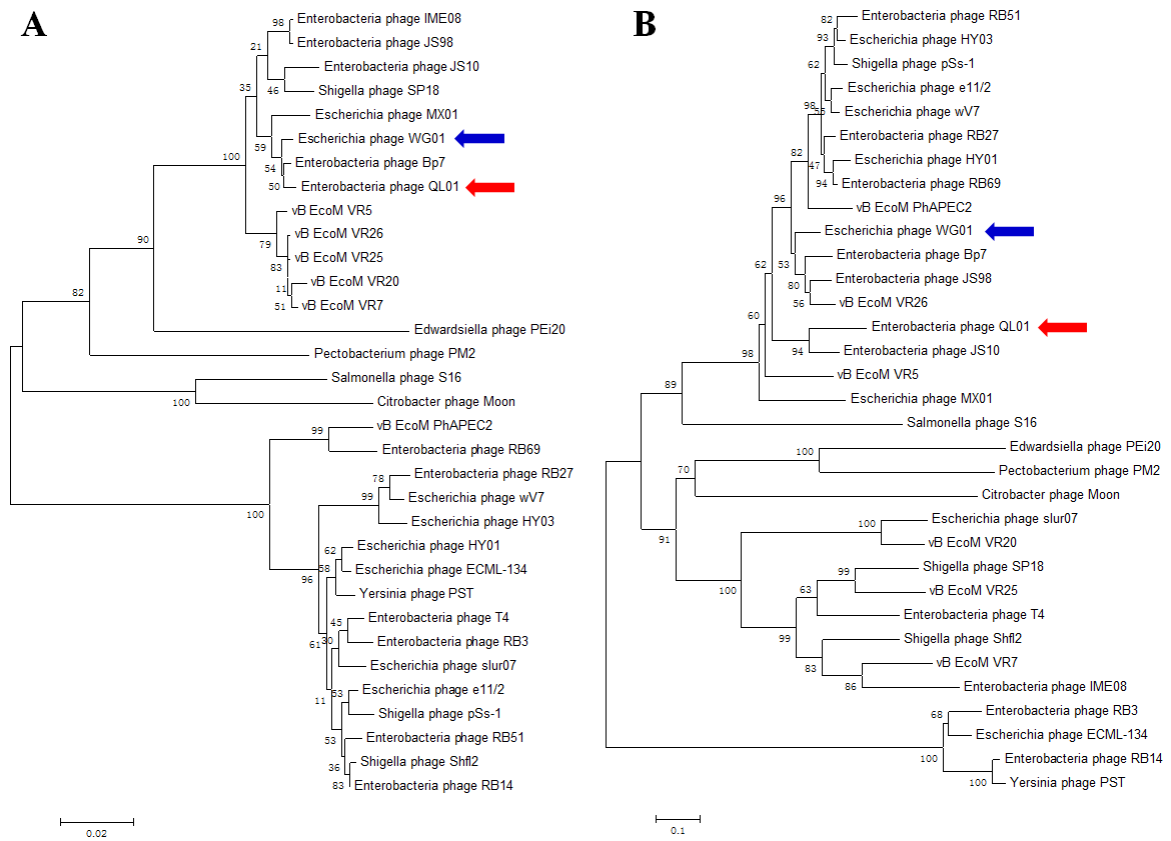

38

39 **Fig. S2 Phylogenetic trees for the amino acid sequences of gp23 and gp37**

40 A neighbor-joining tree analysis and bootstrap analysis (1000 bootstrap replicates)

41 based on the alignment of the amino acid sequence of gp23 (A) and gp37 (B) of 33

42 T4-like phages. The numbers at the nodes indicate the bootstrap probabilities of that

43 particular branch. The phylogenetic tree based on gp23 revealed that WG01 shared a

44 close phylogenetic relationship with Bp7 and QL01; however, in the distance tree of

45 gp37, WG01 shared a close phylogenetic relationship with Bp7, JS98, and

46 vB\_EcoM-VR26, but a distant phylogenetic relationship with QL01. Moreover, QL01

47 and JS10 shared a close evolutionary relationship.

48

# A

```
wV7 1 MATLKQIQFKRSKTAGARPAASVLAEGELAINLKDRVLFTRKDDGQNIIDLGFAKGGSIDGNVITHGNYNQTGDYTLNGFTQIGNFNIGIARVTRDITAG
WG01 1 MATLKQIQFKRSKTAGARPAASVLAEGELAINLKDRVLFTRKDDGQNIIDLGFAKGGSIDGNVITHGNYNQTGDYTLNGFTQIGNFNIGIARVTRDITAG
JS10 1 MATLKQIQFKRSKTAGARPAASVLAEGELAINLKDRVLFTRKDDGQNIIDLGFAKGGSIDGNVITHGNYNQTGDYTLNGFTQIGNFNIGIARVTRDITAG
QL01 1 MATLKQIQFKRSKTAGARPAASVLAEGELAINLKDRVLFTRKDDGQNIIDLGFAKGGSIDGNVITHGNYNQTGDYTLNGFTQIGNFNIGIARVTRDITAG

wV7 101 AGQIMTEGGELTIKSSGTAAHVRFFD-CNSRREGIITAPANDGLTQVNIIRVQDYAAGSESTYAFSGSGLFTSPEVSAWKSISSEPCITLIDKVIITNGKRIK
WG01 101 AGQIMTEGGELTIKSSGTAAHVRFFD-CNSRREGIITAPANDGLTQVNIIRVQDYAAGSESTYAFSGSGLFTSPEVSAWKSISSEPCITLIDKVIITNGKRIK
JS10 101 AGQIMTEGGELTIKSSGTAAHVRFFD-CNSRREGIITAPANDGLTQVNIIRVQDYAAGSESTYAFSGSGLFTSPEVSAWKSISSEPCITLIDKVIITNGKRIK
QL01 101 KSRIMTTEGIVVGNSTAAHVRFFD-CNSRREGIITAPANDGLTQVNIIRVQDYAAGSESTYAFSGSGLFTSPEVSAWKSISSEPCITLIDKVIITNGKRIK

wV7 200 DYDIYSLANNTPISESTFAINHLRVMRNVAGSGIFHEVKDNDGITWYAGDGLAYLWSFTWSGGLKAGHSISIGTPGGPKGYSELGTASIALGDNDTGLK
WG01 200 DYDIYSLANNTPISESTFAINHLRVMRNVAGSGIFHEVKDNDGITWYAGDGLAYLWSFTWSGGLKAGHSISIGTPGGPKGYSELGTASIALGDNDTGLK
JS10 200 DYDIYSLANNTPISESTFAINHLRVMRNVAGSGIFHEVKDNDGITWYAGDGLAYLWSFTWSGGLKAGHSISIGTPGGPKGYSELGTASIALGDNDTGLK
QL01 201 DYDIYSLANNTPISESTFAINHLRVMRNVAGSGIFHEVKDNDGITWYAGDGLAYLWSFTWSGGLKAGHSISIGTPGGPKGYSELGTASIALGDNDTGLK

wV7 300 WIIHDGYFVSNNGKIKLIFSESEITSLRKFVAGYSTNGDLDLPEPTONYALATVITYHDNAFGDQGLLGYQCGNYHHYFRGKGTINVTAGGLLVTF
WG01 300 WIIHDGYFVSNNGKIKLIFSESEITSLRKFVAGYSTNGDLDLPEPTONYALATVITYHDNAFGDQGLLGYQCGNYHHYFRGKGTINVTAGGLLVTF
JS10 300 WIIHDGYFVSNNGKIKLIFSESEITSLRKFVAGYSTNGDLDLPEPTONYALATVITYHDNAFGDQGLLGYQCGNYHHYFRGKGTINVTAGGLLVTF
QL01 297 WIIHDGYFVSNNGKIKLIFSESEITSLRKFVAGYSTNGDLDLPEPTONYALATVITYHDNAFGDQGLLGYQCGNYHHYFRGKGTINVTAGGLLVTF

wV7 400 GNIIDVYGGSVNIDGRNNSSTLMEFGNTTGSSSVDNMTIISWGNFTFNIPSEGRKKNVME
WG01 400 GNIIDVYGGSVNIDGRNNSSTLMEFGNTTGSSSVDNMTIISWGNFTFNIPSEGRKKNVME
JS10 400 GNIIDVYGGSVNIDGRNNSSTLMEFGNTTGSSSVDNMTIISWGNFTFNIPSEGRKKNVME
QL01 397 GNIIDVYGGSVNIDGRNNSSTLMEFGNTTGSSSVDNMTIISWGNFTFNIPSEGRKKNVME
```

# B

```
wV7 458 IISDATSWMSYIQRTTAGKVESYLNQITMNIENLTVKNAIFLGHISAAECISGAVNALRIWNDYGAIFRNSEGLLHIPTAFGGCKNGITIGPLRPFST
WG01 457 IISDATSWMSYIQRTTAGKVESYLNQITMNIENLTVKNAIFLGHISAAECISGAVNALRIWNDYGAIFRNSEGLLHIPTAFGGCKNGITIGPLRPFST
QL01 454 IISDATSWMSYIQRTTAGKVESYLNQITMNIENLTVKNAIFLGHISAAECISGAVNALRIWNDYGAIFRNSEGLLHIPTAFGGCKNGITIGPLRPFST
JS10 457 IISDATSWMSYIQRTTAGKVESYLNQITMNIENLTVKNAIFLGHISAAECISGAVNALRIWNDYGAIFRNSEGLLHIPTAFGGCKNGITIGPLRPFST

wV7 558 ALDTGKVVIFDILSSMNTFAANGITKRVGHGAGAGGYDICYSAAPITFQIDDAAVSKYPIVQKQFTNGKAVWSLSTETNSGTFVLHLLKEDGSCGHTS
WG01 551 ALDTGKVVIFDILSSMNTFAANGITKRVGHGAGAGGYDICYSAAPITFQIDDAAVSKYPIVQKQFTNGKAVWSLSTETNSGTFVLHLLKEDGSCGHTS
QL01 554 ALDTGKVVIFDILSSMNTFAANGITKRVGHGAGAGGYDICYSAAPITFQIDDAAVSKYPIVQKQFTNGKAVWSLSTETNSGTFVLHLLKEDGSCGHTS
JS10 557 ALDTGKVVIFDILSSMNTFAANGITKRVGHGAGAGGYDICYSAAPITFQIDDAAVSKYPIVQKQFTNGKAVWSLSTETNSGTFVLHLLKEDGSCGHTS

wV7 658 ----RFNADGTVNFPDNDVQVGGGEATIARNGNIFSDIWKTEISAGDITNIRDALATRVAKEGDVTMTG
WG01 651 ----RFNADGTVNFPDNDVQVGGGEATIARNGNIFSDIWKTEISAGDITNIRDALATRVAKEGDVTMTG
QL01 651 GIKYWRFTKRG--NEVITRNLRYAGTAFMNTDGNLAGSIWKNYSGA---FNLDAAVNTRVKSGSDVTMTG
JS10 654 GIKYWRFTKRG--NEVITRNLRYAGTAFMNTDGNLAGSIWKNYSGA---FNLDAAVNTRVKSGSDVTMTG
```

# C

```
JS10 714 RLITKINSDAVVIDYPADEAGYVKKKGVDNWNVGNGGADNGLAIFWSPQSGGINTHNGEVVLSPOGASVFNINRDRITMNGSNWIAHKSAGWDQW
WG01 714 RLITKINSDAVVIDYPADEAGYVKKKGVDNWNVGNGGADNGLAIFWSPQSGGINTHNGEVVLSPOGASVFNINRDRITMNGSNWIAHKSAGWDQW
QL01 714 KLIVKRGSDAINIAADENDSAYLLGTSGGANSWYIGKGGADDTASFYNEKTTAGLITNSVGDIDFVNRQATAASLNRYLYLNGRQWATQGHGYNNQW
wV7 721 KLIVKRGSDAINIAADENDSAYLLGTSGGANSWYIGKGGADDTASFYNEKTTAGLITNSVGDIDFVNRQATAASLNRYLYLNGRQWATQGHGYNNQW

JS10 816 GLPAPYFLEFG-SVGEDSYPIIKGRSVISGQYITTSVELGMRNPE--QAWCOAIRVGNABRGDC--EVGIFEFHSSGLYAPITLVQITLAIIGVGTINQ
WG01 813 GLPAPYFLEFG-SVGEDSYPIIKGRSVISGQYITTSVELGMRNPE--QAWCOAIRVGNABRGDC--EVGIFEFHSSGLYAPITLVQITLAIIGVGTINQ
QL01 814 QTEAPFVDFEGSVPKDSYPIIKGRSVISGQYITTSVELGMRNPE--QAWCOAIRVGNABRGDC--EVGIFEFHSSGLYAPITLVQITLAIIGVGTINQ
wV7 821 QTEAPFVDFEGSVPKDSYPIIKGRSVISGQYITTSVELGMRNPE--QAWCOAIRVGNABRGDC--EVGIFEFHSSGLYAPITLVQITLAIIGVGTINQ

JS10 909 LQSP
WG01 906 LQAS
QL01 913 WGGG
wV7 920 WGGG
```

# D

```
QL01 918 STAIGDDDTGLVHGGDGRINMYANSMHIASWAGYHIHGLWDTTGALWTEGTRAITISFGHLVQANDSYSTVVRDYYVRSRDIKVKKDLVKFENASQILSKL
WG01 911 STAIGDDDTGLVHGGDGRINMYANSMHIASWAGYHIHGLWDTTGALWTEGTRAITISFGHLVQANDSYSTVVRDYYVRSRDIKVKKDLVKFENASQILSKL
JS10 914 STAIGDDDTGLVHGGDGRINMYANSMHIASWAGYHIHGLWDTTGALWTEGTRAITISFGHLVQANDSYSTVVRDYYVRSRDIKVKKDLVKFENASQILSKL
wV7 925 STAIGDDDTGLVHGGDGRINMYANSMHIASWAGYHIHGLWDTTGALWTEGTRAITISFGHLVQANDSYSTVVRDYYVRSRDIKVKKDLVKFENASQILSKL

QL01 1018 INGYTYMOKRGLDEEGNQKWPENAGLIAQEVQAILPELVEGDDPGEALLRLNNGVIGLNTAAINEHTAEIABLKSEIEELKALIKSLK
WG01 1011 INGYTYMOKRGLDEEGNQKWPENAGLIAQEVQAILPELVEGDDPGEALLRLNNGVIGLNTAAINEHTAEIABLKSEIEELKALIKSLK
JS10 1014 INGYTYMOKRGLDEEGNQKWPENAGLIAQEVQAILPELVEGDDPGEALLRLNNGVIGLNTAAINEHTAEIABLKSEIEELKALIKSLK
wV7 1025 INGYTYMOKRGLDEEGNQKWPENAGLIAQEVQAILPELVEGDDPGEALLRLNNGVIGLNTAAINEHTAEIABLKSEIEELKALIKSLK
```

49

50 **Fig. S3 Alignment results of gp37 of WG01 with other homologous T4-like**

51 **phages**

52 The different amino acids domains (1–456, 457–713, 714–910, and 911–1100) of

53 WG01 gp37 was compared with the corresponding protein sequences of QL01, JS10,

54 and wV7.

55 (A) The N-terminal domain (amino acids 1–456) of WG01 gp37 was compared with  
56 the corresponding protein sequences of QL01, JS10, and wV7.

57 (B) The N-terminal domain (amino acids 457–713) of WG01 gp37 was compared  
58 with the corresponding protein sequences of QL01, JS10, and wV7.

59 (C) The WG01 gp37 C-terminal domain (amino acids 714–910) was compared with  
60 the corresponding protein sequences of QL01, JS10, and wV7.

61 (D) The WG01 gp37 C-terminal receptor attachment domain (amino acids 911–1100)  
62 was compared with the corresponding protein sequences of QL01, JS10, and  
63 wV7.

64 The black boxes represent the same amino acids. Grey boxes represent the amino  
65 acids in the same classification. In (B) and (C), the amino acid sequences exhibited a  
66 higher homology with the corresponding parts of WG01 marked with red boxes. The  
67 amino acid sequences exhibiting a lower homology with the corresponding parts of  
68 WG01 are marked with blue boxes.

A

WG01 1 MATLKQIQFKRSKVAGVRPAPAQLAEGELAINLKRLLFTKDDTGAIIDLGFAGKGNIDGNVHFGNYNQTGLYPLNEVFE  
 QL01 1 MATLKQIQFKRSKVAGVRPAPAQLAEGELAINLKRLLFTKDDTGAIIDLGFAGKGNIDGNVHFGNYNQTGLYPLNEVFE  
 WG01 81 TQICEDNINLSTARVTRDTHAQQNTTCCGELISFSASFSRFFFLSPDRERGLTISFNNAFCHNOVAVNRVQDYAAGEE  
 QL01 81 TQCSSTTTSSTITANGDITAKSRNMTMGEVTVRGGNGAHVRFDDLADARERAILISGRRTSPTRKILINRVRQDYTNSSGS  
 WG01 160 STYAFSGNGVFSSEWVFWKRSVSTPVIYTNRVINRKRVRSDYDIYSLADNTPFEEGEGATNHLRVMNAVCACTPHEMNV  
 QL01 161 NIPAFNCGEFTFYAFSSSAGTSVRSEVYITNVAWDSRNIQDVIDLSSLANNN----SAPDRNMLRVVMTDPSAHLHEHCE  
 WG01 240 NNGIHWYSGGDLDTYVWSPNNAAGLKAHSTISVGLPGGSKGYSLELCTASTALGDNDFGRKWHODGYFFSVNNGTRRFRISG  
 QL01 237 NNGIHWYSGGSTPTDYVWSPNNAAGLKAHSTISVGLPGGSKGYSLELCTASTALGDNDFGRKWHODGYFFSVNNGTRRFRISG  
 WG01 320 PADHTSLKIKVMEYSVNGDITTEPSENYALATVWYHNNAGDGGTLLGYDQGNVHHYFRGKGTINVTAGGLLVTB  
 QL01 317 PDEWTSLQQLVAGSYNNGSDILLETQNYFPIVWNTNDRNSEGQDGLLGYDQGNVHHYFRGKGTINVTAGGLLVTB  
 WG01 400 GNIIVVGGSVNIDGRNASTMEKGNITTCSSVDNMTDAVGNFTNTDGRKNVMEISDATSNMNYIQRTDKVBAH  
 QL01 397 GNIIVVGGSVNIDGRNASTMEKGNITTCSSVDNMTDAVGNFTNTDGRKNVMEISDATSNMNYIQRTDKVBAH  
 WG01 480 NG-----FRVNGSSIDVGEVNVVSTLAGVNVNLRINWDTYCAIFRSESSLHLIPTAFGEKRTEDGPIRPSALD  
 QL01 477 NGPTMNVIEGLVWQDTSIKRNIYVSENLKVRASGLRINWDRYGVIFRSEDLHLIPTANANAGESSGGLRPLSLTLD  
 WG01 554 TGRVLPDLDLSHTLBAENGTIKGCHGAGGCDIYQAAPITQEDDIDAVSKYPIVVKORFLQGKAVWSTLCTEINS  
 QL01 557 TGRVLPDLDLSHTLBAENGTIKGCHGAGGCDIYQAAPITQEDDIDAVSKYPIVVKORFLQGKAVWSTLCTEINS  
 WG01 634 TGVVHHYKDGTCGHTS----RENALGTVNEPDNVQVGGGPAITARNNGNIFSDIWNQNGAGNITNIRDALATRVSRG  
 QL01 634 EPRIVAQGLLGDSDAGLQVWRFKKCF--NFIITRNRYGCFAPNNTIGNIAGSLWNKISGA---TNLDAAVNRVQRG  
 WG01 709 DVTMGILVTRTNSDAMVIDYPADLASYVTRKKGVDNMYVNGGADNGLAFVSEVQSGCININPNSEVILSPQ-GNSIFG  
 QL01 709 DVTMGILVTRTNSDAMVIDYPADLASYVTRKKGVDNMYVNGGADNGLAFVSEVQSGCININPNSEVILSPQ-GNSIFG  
 WG01 788 INRIRIYINGAHVVRKSGAGDQVGLQAPVLEFG-SVGGSDSYPIIKGSEVSGQYITVSLGCRTP--CQWGAJ  
 QL01 789 INRIRIYINGAHVVRKSGAGDQVGLQAPVLEFG-SVGGSDSYPIIKGSEVSGQYITVSLGCRTP--CQWGAJ  
 WG01 865 IIRVGNARSGS--EVEIFEEHSSSEFYSFSSVQT-PSISVNDMLGSSIAIGDNTGLVHGGDGRINMYANSMHIAW  
 QL01 869 IIRVGSABSSSHEVMAIVEQANSEKRAAGLRAGVNGVSEIPIVWGEASIAIGDNTGLVHGGDGRINMYANSMHIAW  
 WG01 942 GAGYVHIEGLWDTTGALWTFETGRAIISFGHLVQQNDSYSTFVRDYYVRSDIRVKKDLVKFENASQTLKINGYTYMQRG  
 QL01 949 GAGYVHIEGLWDTTGALWTFETGRAIISFGHLVQQNDSYSTFVRDYYVRSDIRVKKDLVKFENASQTLKINGYTYMQRG  
 WG01 1022 LDEEGNQKWEPNAGLIAEQVQAILPELVGDPDGEALLRINVNGVIGLNTAAINEHTAEIAELKSEIEELKALIKSLK  
 QL01 1029 LDEEGNQKWEPNAGLIAEQVQAILPELVGDPDGEALLRINVNGVIGLNTAAINEHTAEIAELKSEIEELKALIKSLK

B

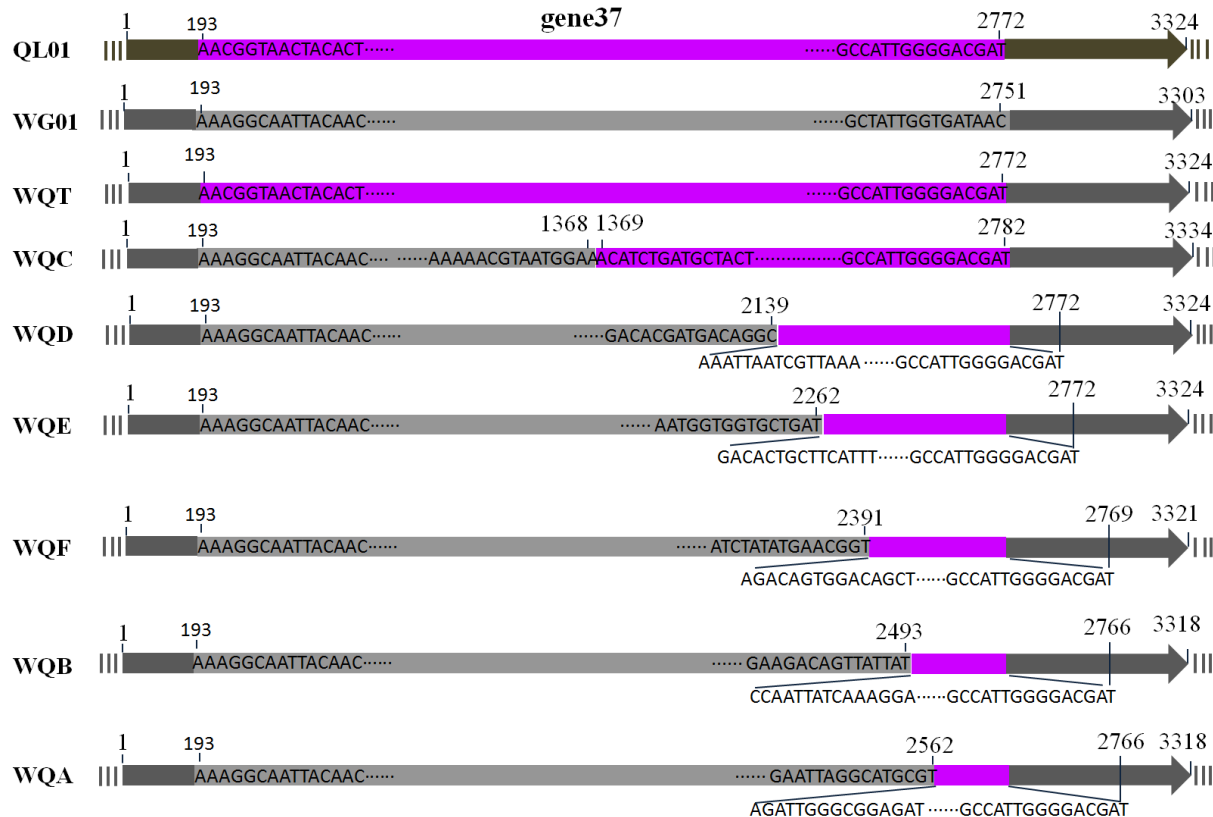

72 **Fig. S4 Comparison and recombination positions between QL01 and WG01 on gene37**

73 **(A) Alignment results of gp37 from WG01 and QL01**

74 The gp37 of WG01 exhibited a relatively low degree of sequence conservation with 59% identity associated with QL01. A high identity (100%)  
75 of the amino acid alignment in the first 64 aa of the gp37 N-terminal domain and the first 183 aa of gp37 C-terminal domain between WG01 and  
76 QL01 was observed. In contrast, minimal homology was observed in the other regions of gp37. The positions of the initiation sites for the  
77 different recombinant fragments and the name of the DNA fragments are indicated above the sequence.

78 **(B) The recombination positions between QL01 and WG01 on gene37**

79 Gene37 diagrams of the QL01, WG01, and WG01 derivatives (WQT, WQC, WQD, WQE, WQF, WQB, and WQA) are displayed. The nucleic  
80 acid sequences of the changes are indicated on or in the diagram. The recombination positions between QL01 and WG01 on the gene37 locus are  
81 indicated above the diagrams. The color gray represents WG01, which was modified in this study. The color mauve represents the exchanged  
82 regions which are derived from QL01. For example, in WQT, the region from 193 to 2772 was the exchanged region from QL01.

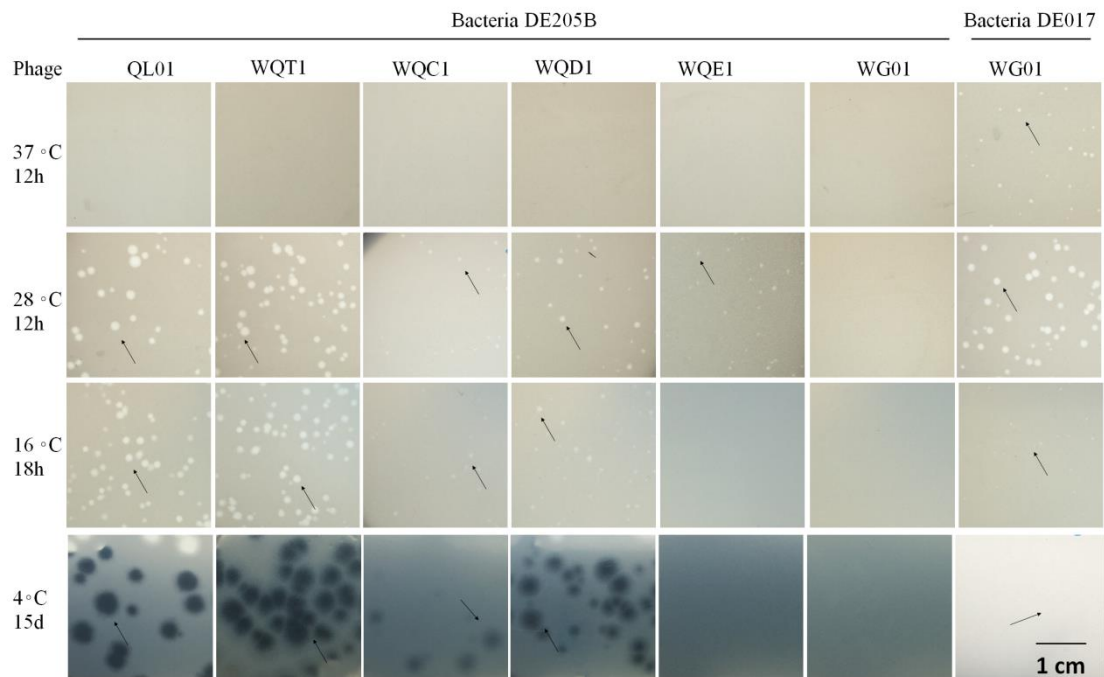

84

85 **Fig. S5 Growth characteristics of WG01, QL01, and WG01 derivatives**

86 The results of the growth characteristics for WG01, QL01, WQT1, WQC1, WQD1,  
87 and WQE1 were displayed. On the lawn of DE205B, QL01, WQT1, WQC1, and  
88 WQD1 all formed plaques at 28 °C, 16 °C, and 4 °C, rather than at 37 °C; WQE1 only  
89 formed plaques at 28 °C. WG01 could not infect DE205B, but could form plaques at  
90 37 °C, 28 °C, 16 °C and 4 °C with DE017.



91

92 **Table S1** strains used in phage isolation and host range analysis of recombinant phages

| Strains | WQT2 | WQT3 | WQT4 | WQT5 | WQT6 | WQT7 | WQT8 | WQT9 | WQT10 | WQT11 | WQT12 | QL01 | WQC | WQD | WQE | WG01 | WQT1 |
|---------|------|------|------|------|------|------|------|------|-------|-------|-------|------|-----|-----|-----|------|------|
| DE001   | -    | -    | -    | -    | -    | -    | -    | -    | -     | -     | -     | +    | -   | -   | -   | -    | -    |
| DE002   | -    | -    | -    | -    | -    | -    | -    | -    | -     | -     | -     | -    | -   | -   | -   | -    | -    |
| DE003   | +    | +    | +    | +    | +    | +    | +    | +    | +     | +     | +     | +    | +   | +   | +   | -    | +    |
| DE005   | -    | -    | -    | -    | -    | -    | -    | -    | -     | -     | -     | -    | -   | -   | -   | -    | -    |
| DE007   | -    | -    | -    | -    | -    | -    | -    | -    | -     | -     | -     | -    | -   | -   | -   | -    | -    |
| DE008   | +    | +    | +    | +    | +    | +    | +    | +    | +     | +     | +     | +    | +   | +   | +   | -    | +    |
| DE010   | -    | -    | -    | -    | -    | -    | -    | -    | -     | -     | -     | -    | -   | -   | -   | -    | -    |
| DE011   | -    | -    | -    | -    | -    | -    | -    | -    | -     | -     | -     | -    | +   | +   | +   | -    | -    |
| DE013   | -    | -    | -    | -    | -    | -    | -    | -    | -     | -     | -     | -    | -   | -   | -   | -    | -    |
| DE015   | +    | +    | +    | +    | +    | +    | +    | +    | +     | +     | +     | +    | +   | +   | +   | +    | +    |
| DE017   | +    | +    | +    | +    | +    | +    | +    | +    | +     | +     | +     | +    | +   | +   | +   | +    | +    |
| DE018   | +    | +    | +    | +    | +    | +    | +    | +    | +     | +     | +     | -    | +   | +   | -   | -    | +    |
| DE019   | -    | -    | -    | -    | -    | -    | -    | -    | -     | -     | -     | -    | -   | -   | -   | -    | -    |
| DE020   | -    | -    | -    | -    | -    | -    | -    | -    | -     | -     | -     | -    | -   | -   | -   | -    | -    |
| DE021   | +    | +    | +    | +    | +    | +    | +    | +    | +     | +     | +     | +    | +   | +   | +   | +    | +    |
| DE022   | -    | -    | -    | -    | -    | -    | -    | -    | -     | -     | -     | -    | -   | -   | -   | -    | -    |
| DE023   | +    | +    | +    | +    | +    | +    | +    | +    | +     | +     | +     | +    | +   | +   | -   | -    | +    |
| DE028   | +    | +    | +    | +    | +    | +    | +    | +    | +     | +     | +     | +    | +   | +   | -   | -    | +    |
| DE032   | +    | +    | +    | +    | +    | +    | +    | +    | +     | +     | +     | +    | +   | +   | -   | -    | +    |
| DE034   | -    | -    | -    | -    | -    | -    | -    | -    | -     | -     | -     | -    | +   | +   | +   | +    | -    |
| DE037   | +    | +    | +    | +    | +    | +    | +    | +    | +     | +     | +     | -    | +   | +   | -   | -    | +    |

|       |   |   |   |   |   |   |   |   |   |   |   |   |   |   |   |   |   |
|-------|---|---|---|---|---|---|---|---|---|---|---|---|---|---|---|---|---|
| DE041 | - | - | - | - | - | - | - | - | - | - | - | - | - | - | - | - | - |
| DE044 | - | - | - | - | - | - | - | - | - | - | - | - | + | + | + | + | - |
| DE046 | - | - | - | - | - | + | - | - | - | - | - | - | - | + | - | - | - |
| DE049 | - | - | - | - | - | - | - | - | - | - | - | - | - | - | - | - | - |
| DE050 | - | - | - | - | - | - | - | - | - | - | - | - | - | - | - | - | - |
| DE054 | - | - | - | - | - | - | - | - | - | - | - | - | - | - | - | - | - |
| DE056 | - | - | - | - | - | - | - | - | - | - | - | - | - | - | - | - | - |
| DE060 | - | - | - | - | - | - | - | - | - | - | - | - | - | - | - | - | - |
| DE061 | - | - | - | - | - | - | - | - | - | - | - | - | + | + | + | - | - |
| DE064 | - | - | - | - | - | - | - | - | - | - | - | - | - | - | - | - | - |
| DE065 | - | - | - | - | - | - | - | - | - | - | - | - | - | - | - | - | - |
| DE069 | - | - | - | - | - | - | - | - | - | - | - | - | + | + | + | + | - |
| DE070 | - | - | - | - | - | - | - | - | - | - | - | - | - | - | - | - | - |
| DE071 | - | - | - | - | - | - | - | - | - | - | - | - | - | - | - | - | - |
| DE072 | + | + | + | + | + | + | + | + | + | + | + | + | + | + | + | + | + |
| DE074 | - | - | - | - | - | - | - | - | - | - | - | - | - | - | - | - | - |
| DE075 | - | - | - | - | - | - | - | - | - | - | - | - | + | + | + | - | - |
| DE077 | - | - | - | - | - | - | - | - | - | - | - | - | + | + | + | - | - |
| DE083 | - | - | - | - | - | - | - | - | - | - | - | - | - | - | - | - | - |
| DE085 | - | - | - | - | - | + | - | - | - | - | - | - | - | + | - | - | - |
| DE094 | - | - | - | - | - | - | - | - | - | - | - | - | - | - | - | - | - |
| DE098 | - | - | - | - | - | - | - | - | - | - | - | - | - | - | - | - | - |
| DE101 | + | + | + | + | + | + | + | + | + | + | + | + | - | + | + | + | - |
| DE102 | + | + | + | + | + | + | + | + | + | + | + | + | - | + | - | + | - |
| DE104 | + | + | + | + | + | + | + | + | + | + | + | + | - | + | + | - | + |
| DE119 | - | - | - | - | - | - | - | - | - | - | - | + | - | - | - | - | - |





|               |    |    |    |    |    |    |    |    |    |    |    |    |    |    |    |    |    |   |
|---------------|----|----|----|----|----|----|----|----|----|----|----|----|----|----|----|----|----|---|
| DE426         | -  | -  | -  | -  | -  | -  | -  | -  | -  | -  | -  | -  | -  | -  | -  | -  | -  | - |
| DE432         | -  | -  | -  | -  | -  | -  | -  | -  | -  | -  | -  | -  | -  | -  | -  | -  | -  | - |
| DE452         | +  | +  | +  | +  | +  | +  | +  | +  | +  | +  | +  | +  | -  | +  | -  | +  | +  |   |
| DE458         | -  | -  | -  | -  | -  | -  | -  | -  | -  | -  | -  | -  | -  | -  | -  | -  | -  |   |
| DE464         | -  | -  | -  | -  | -  | -  | -  | -  | -  | -  | -  | -  | -  | -  | -  | -  | -  |   |
| XM            | +  | +  | +  | +  | +  | +  | +  | +  | +  | +  | +  | +  | +  | +  | +  | +  | +  |   |
| HX01          | -  | -  | -  | -  | -  | +  | -  | -  | -  | -  | -  | +  | -  | +  | -  | -  | -  |   |
| HX04          | -  | -  | -  | -  | -  | -  | -  | -  | -  | -  | -  | -  | -  | -  | -  | -  | -  |   |
| NT-1          | +  | +  | +  | +  | +  | +  | +  | +  | +  | +  | +  | +  | +  | +  | +  | +  | +  |   |
| MC1061        | +  | +  | +  | +  | +  | +  | +  | +  | +  | +  | +  | -  | +  | +  | +  | +  | +  |   |
| MG1655        | -  | -  | -  | -  | -  | -  | -  | -  | -  | -  | -  | -  | -  | -  | -  | -  | -  |   |
| O157:H7       | -  | -  | -  | -  | -  | -  | -  | -  | -  | -  | -  | -  | -  | -  | -  | -  | -  |   |
| RS218         | +  | +  | +  | +  | +  | +  | +  | +  | +  | +  | +  | +  | +  | +  | +  | +  | +  |   |
| 5155          | +  | +  | +  | +  | +  | +  | +  | +  | +  | +  | +  | +  | +  | +  | +  | +  | +  |   |
| Host<br>range | 49 | 49 | 49 | 49 | 49 | 52 | 49 | 49 | 49 | 49 | 49 | 50 | 47 | 63 | 28 | 22 | 46 |   |

93

94 +, clear lysis; -, no reaction

95 **Table S2** T4-like phages that showed homology with the genome sequence of QL01

| Phage                             | Host strain                                                 | RefSeq      | Size (bp) | Query % | Ident % |
|-----------------------------------|-------------------------------------------------------------|-------------|-----------|---------|---------|
| Enterobacteria phage WG01         | <i>Escherichia coli</i>                                     | NC_031928.1 | 169936    | 100     | 100     |
| Enterobacteria phage Bp7          | <i>Escherichia coli</i>                                     | NC_019500.1 | 168066    | 92      | 98      |
| Enterobacteria phage JS98         | <i>Escherichia coli</i>                                     | NC_010105.1 | 170523    | 94      | 92      |
| Enterobacteria phage QL01         | <i>Escherichia coli</i>                                     | NC_028847.1 | 170527    | 95      | 98      |
| Enterobacteria phage JS10         | <i>Escherichia coli</i>                                     | NC_012741.1 | 171451    | 93      | 93      |
| Enterobacteria phage MX01         | <i>Escherichia coli</i>                                     | NC_031934.1 | 168929    | 93      | 94      |
| Enterobacteria phage vB_EcoM_VR5  | <i>Escherichia coli</i>                                     | NC_028881.1 | 170473    | 90      | 90      |
| Enterobacteria phage IME08        | <i>Escherichia coli</i>                                     | NC_014260.1 | 172253    | 91      | 92      |
| Enterobacteria phage vB_EcoM_VR20 | <i>Escherichia coli</i>                                     | NC_028894.1 | 170336    | 76      | 79      |
| Enterobacteria phage vB_EcoM_VR25 | <i>Escherichia coli</i>                                     | NC_028925.1 | 170822    | 74      | 79      |
| Shigella phage SP18               | <i>Shigella sonnei</i>                                      | NC_014595.1 | 170605    | 76      | 77      |
| Enterobacteria phage vB_EcoM_VR26 | <i>Escherichia coli</i>                                     | NC_028957.1 | 171541    | 74      | 81      |
| Enterobacteria phage vB_EcoM_VR7  | <i>Escherichia coli</i>                                     | NC_014792.1 | 169285    | 72      | 80      |
| Edwardsiella phage PEi20          | <i>Edwardsiella ictaluri</i>                                | NC_028683.1 | 177643    | 52      | 80      |
| Pectobacterium bacteriophage PM2  | <i>Pectobacterium carotovorum</i> subsp. <i>Carotovorum</i> | NC_028940.1 | 170286    | 51      | 78      |
| Escherichia phage slur07          | <i>Escherichia coli</i>                                     | NC_028780.1 | 167124    | 48      | 76      |
| Escherichia phage ECML-134        | <i>Escherichia coli</i>                                     | NC_025449.1 | 166783    | 48      | 75      |
| Escherichia phage HY01            | <i>Escherichia coli</i>                                     | NC_027349.1 | 166977    | 50      | 76      |
| Shigella phage pSs-1              | <i>Shigella sonnei</i>                                      | NC_025829.1 | 164999    | 49      | 75      |
| Enterobacteria phage T4           | <i>Escherichia coli</i>                                     | NC_000866.4 | 168903    | 46      | 76      |
| Enterobacteria phage RB27         | <i>Escherichia coli</i>                                     | NC_025448.1 | 165179    | 48      | 76      |
| Yersinia phage PST                | <i>Yersinia pseudotuberculosis</i>                          | NC_027404.1 | 167785    | 49      | 76      |
| Enterobacteria phage RB3          | <i>Escherichia coli</i>                                     | NC_025419.1 | 168402    | 44      | 76      |
| Enterobacteria phage RB14         | <i>Escherichia coli</i>                                     | NC_012638.1 | 165429    | 48      | 76      |
| Escherichia phage wV7             | <i>Escherichia coli</i>                                     | NC_019505.1 | 166452    | 49      | 75      |
| Shigella phage Shfl2              | <i>Shigella flexneri</i>                                    | NC_015457.1 | 165919    | 48      | 75      |
| Escherichia phage HY03            | <i>Escherichia coli</i>                                     | NC_031047.1 | 170770    | 47      | 75      |
| Escherichia phage e11/2           | <i>Escherichia coli</i>                                     | NC_024125.2 | 168470    | 48      | 75      |
| Escherichia phage vB_EcoM_PhAPEC2 | <i>Escherichia coli</i>                                     | NC_024794.1 | 167318    | 57      | 75      |
| Enterobacteria phage RB69         | <i>Escherichia coli</i>                                     | NC_004928.1 | 167560    | 58      | 75      |

---

|                           |                             |             |        |    |    |
|---------------------------|-----------------------------|-------------|--------|----|----|
| Enterobacteria phage RB51 | <i>Escherichia coli</i>     | NC_012635.1 | 168394 | 50 | 75 |
| Citrobacter phage Moon    | <i>Citrobacter freundii</i> | NC_027331.1 | 170341 | 41 | 75 |
| Salmonella phage S16      | <i>Salmonella enterica</i>  | NC_020416.1 | 160221 | 33 | 72 |

---

96

97

98

99

100 **Table S3.** Comparison results for WG01 and QL01

101

| QL01<br>ORF | WG01<br>ORF | WG01 protein identity<br>with the proteins of<br>QL01 |      | Protein (from NCBI) identity with either WG01 or<br>QL01 proteins |       |      | Product                                         |
|-------------|-------------|-------------------------------------------------------|------|-------------------------------------------------------------------|-------|------|-------------------------------------------------|
|             |             | query                                                 | iden | phage                                                             | query | iden |                                                 |
| 1           | 1           | 100                                                   | 99   |                                                                   |       |      | rIIA protects from prophage-induced early lysis |
| 2           | 2           | 100                                                   | 99   |                                                                   |       |      | hypothetical protein                            |
| 3           | 3           | 100                                                   | 99   |                                                                   |       |      | hypothetical protein                            |
| 4           | 4           | 100                                                   | 96   |                                                                   |       |      | hypothetical protein                            |
| 5           | 5           | 100                                                   | 100  |                                                                   |       |      | topoisomerase II large subunit                  |
| 6           | 6           | 100                                                   | 100  |                                                                   |       |      | hypothetical protein                            |
| 7           | 7           | 100                                                   | 100  |                                                                   |       |      | hypothetical protein                            |
| 8           | 8           | 100                                                   | 99   |                                                                   |       |      | putative RNA metabolism modulator               |
| 9           | 9           | 100                                                   | 100  |                                                                   |       |      | modifier of suppressor tRNAs                    |
| 10          | 10          | 100                                                   | 87   |                                                                   |       |      | modifier of transcription                       |
| 11          | 11          | 100                                                   | 97   |                                                                   |       |      | hypothetical protein                            |
| 12          | 12          | 100                                                   | 97   |                                                                   |       |      | hypothetical protein                            |
| 13          | 13          | 100                                                   | 99   |                                                                   |       |      | hypothetical protein                            |
| 14          | 14          | 100                                                   | 97   |                                                                   |       |      | hypothetical protein                            |
| 15          | 15          | 100                                                   | 99   |                                                                   |       |      | DNA helicase                                    |
| 16          | 16          | 100                                                   | 100  |                                                                   |       |      | hypothetical protein                            |
| 17          | 17          | 100                                                   | 99   |                                                                   |       |      | putative Srd anti-sigma factor                  |
| 18          | 18          | 100                                                   | 99   |                                                                   |       |      | hypothetical protein                            |
| 19          | 19          | 100                                                   | 99   |                                                                   |       |      | hypothetical protein                            |
| -           | 20          | -                                                     | -    | Shigella phage SP18_gp021                                         | 100   | 59   | hypothetical protein                            |



|    |    |     |     |                                      |
|----|----|-----|-----|--------------------------------------|
| 20 | 21 | 100 | 97  | hypothetical protein                 |
| 21 | 22 | 100 | 88  | hypothetical protein                 |
| 22 | 23 | 100 | 93  | hypothetical protein                 |
| 23 | 24 | 100 | 98  | Srh transcription modulator          |
| 24 | 25 | 81  | 92  | hypothetical protein                 |
| 25 | 26 | 100 | 100 | hypothetical protein                 |
| 26 | 27 | 100 | 92  | hypothetical protein                 |
| 27 | 28 | 100 | 100 | dCTPase                              |
| 28 | 29 | 100 | 100 | hypothetical protein                 |
| 29 | 30 | 100 | 100 | hypothetical protein                 |
| 30 | 31 | 100 | 100 | hypothetical protein                 |
| 31 | 32 | 100 | 100 | hypothetical protein                 |
| 32 | 33 | 100 | 99  | hypothetical protein                 |
| 33 | 34 | 100 | 96  | spackle periplasmic protein          |
| 34 | 35 | 100 | 99  | hypothetical protein                 |
| 35 | 36 | 100 | 98  | hypothetical protein                 |
| 36 | 37 | 100 | 97  | discriminator of mRNA degradation    |
| 37 | 38 | 100 | 100 | hypothetical protein                 |
| 38 | 39 | 100 | 100 | DNA primase-helicase subunit         |
| 39 | 40 | 100 | 100 | hypothetical protein                 |
| 40 | 41 | 100 | 100 | UvsX RecA-like recombination protein |
| 41 | 42 | 100 | 99  | hypothetical protein                 |
| 42 | 43 | 100 | 100 | hypothetical protein                 |
| 43 | 44 | 100 | 100 | hypothetical protein                 |
| 44 | 45 | 100 | 100 | hypothetical protein                 |
| 45 | 46 | 100 | 100 | hypothetical protein                 |

|    |    |     |     |          |     |    |                                                                                            |
|----|----|-----|-----|----------|-----|----|--------------------------------------------------------------------------------------------|
| 46 | 47 | 100 | 100 |          |     |    | hypothetical protein                                                                       |
| 47 | 48 | 100 | 100 |          |     |    | immunity to superinfection membrane protein                                                |
| 48 | 49 | 100 | 99  |          |     |    | DNA polymerase                                                                             |
| 49 | 50 | 100 | 99  |          |     |    | hypothetical protein                                                                       |
| 50 | 51 | 100 | 100 |          |     |    | translational repressor protein                                                            |
| 51 | 52 | 100 | 99  |          |     |    | clamp loader subunit DNA polymerase                                                        |
| 52 | 53 | 100 | 99  |          |     |    | hypothetical protein                                                                       |
| 53 | 54 | 100 | 100 |          |     |    | sliding clamp DNA polymerase accessory protein                                             |
| 54 | 55 | 100 | 100 |          |     |    | hypothetical protein                                                                       |
| 55 | 56 | 100 | 100 |          |     |    | hypothetical protein                                                                       |
| 56 | 57 | 100 | 99  |          |     |    | hypothetical protein                                                                       |
| 57 | 58 | 100 | 100 |          |     |    | hypothetical protein                                                                       |
| 58 | 59 | 100 | 100 |          |     |    | hypothetical protein                                                                       |
| 59 | 60 | 100 | 97  |          |     |    | recombination endonuclease subunit                                                         |
| 60 | -  | -   | -   | BP7_0131 | 55  | 61 | N-terminal catalytic GIY-YIG domain of bacteriophage T4 segABCDEFGF gene encoding proteins |
| -  | 61 | -   | -   | JS98_058 | 100 | 98 | gp47.1 hypothetical predicted membrane protein                                             |
| 61 | 62 | 100 | 100 |          |     |    | hypothetical protein                                                                       |
| 62 | 63 | 100 | 100 |          |     |    | hypothetical protein                                                                       |
| 63 | 64 | 100 | 100 |          |     |    | hypothetical protein                                                                       |
| 64 | 65 | 100 | 100 |          |     |    | hypothetical protein                                                                       |
| 65 | 66 | 100 | 99  |          |     |    | hypothetical protein                                                                       |
| 66 | 67 | 100 | 97  |          |     |    | hypothetical protein                                                                       |
| 67 | 68 | 100 | 100 |          |     |    | hypothetical protein                                                                       |
| 68 | 69 | 100 | 99  |          |     |    | hypothetical protein                                                                       |

|    |    |     |     |                                                               |    |    |                           |
|----|----|-----|-----|---------------------------------------------------------------|----|----|---------------------------|
| 69 | 70 | 100 | 100 |                                                               |    |    | hypothetical protein      |
| 70 | 71 | 100 | 88  |                                                               |    |    | hypothetical protein      |
| 71 | 72 | 100 | 100 |                                                               |    |    | hypothetical protein      |
| 72 | 73 | 100 | 100 |                                                               |    |    | hypothetical protein      |
| 73 | 74 | 100 | 68  |                                                               |    |    | hypothetical protein      |
| 74 | 75 | 100 | 100 |                                                               |    |    | hypothetical protein      |
| 75 | 76 | 100 | 100 |                                                               |    |    | hypothetical protein      |
| 76 | 77 | 100 | 100 |                                                               |    |    | putative membrane protein |
| 77 | 78 | 100 | 100 |                                                               |    |    | hypothetical protein      |
| 78 | 79 | 100 | 100 |                                                               |    |    | hypothetical protein      |
| 79 | 80 | 100 | 100 |                                                               |    |    | hypothetical protein      |
| 80 | 81 | 100 | 100 |                                                               |    |    | hypothetical protein      |
| 81 | 82 | 100 | 100 |                                                               |    |    | hypothetical protein      |
| 82 | 83 | 100 | 100 |                                                               |    |    | thioredoxin               |
| 83 | 84 | 100 | 100 |                                                               |    |    | hypothetical protein      |
| 84 | 85 | 100 | 99  |                                                               |    |    | hypothetical protein      |
| 85 | 86 | 100 | 99  |                                                               |    |    | hypothetical protein      |
| 86 | 87 | 100 | 97  |                                                               |    |    | hypothetical protein      |
| 87 | 88 | 100 | 100 |                                                               |    |    | hypothetical protein      |
| 88 | 89 | 100 | 100 |                                                               |    |    | hypothetical protein      |
| 89 | 90 | 100 | 100 |                                                               |    |    | hypothetical protein      |
| 90 | 91 | 100 | 81  |                                                               |    |    | hypothetical protein      |
| 91 | 92 | 100 | 98  |                                                               |    |    | hypothetical protein      |
| -  | 93 | -   | -   | Edwardsiella phage PEi20_098,<br>Edwardsiella phage PEi26_098 | 96 | 51 | hypothetical protein      |
| 92 | 94 | 100 | 91  |                                                               |    |    | hypothetical protein      |

|     |     |     |     |                              |     |    |                                               |
|-----|-----|-----|-----|------------------------------|-----|----|-----------------------------------------------|
| 93  | 95  | 98  | 99  |                              |     |    | hypothetical protein                          |
| 94  | 96  | 100 | 100 |                              |     |    | hypothetical protein                          |
| 95  | 97  | 100 | 100 |                              |     |    | hypothetical protein                          |
| 96  | 98  | 100 | 95  |                              |     |    | hypothetical protein                          |
| 97  | 99  | 100 | 100 |                              |     |    | hypothetical protein                          |
| 98  | 100 | 100 | 100 |                              |     |    | hypothetical protein                          |
| 99  | 101 | 100 | 100 |                              |     |    | hypothetical protein                          |
| 100 | 102 | 100 | 100 |                              |     |    | hypothetical protein                          |
| 101 | 103 | 100 | 100 |                              |     |    | thymidine kinase                              |
| 102 | 104 | 100 | 59  |                              |     |    | hypothetical protein                          |
| 103 | 105 | 100 | 100 |                              |     |    | hypothetical protein                          |
| 104 | 106 | 100 | 99  |                              |     |    | hypothetical protein                          |
| 105 | 107 | 100 | 100 |                              |     |    | valyl-tRNA synthetase modifier                |
| 106 | 108 | 100 | 98  |                              |     |    | hypothetical protein                          |
| 107 | 109 | 100 | 98  |                              |     |    | site-specific RNA endonuclease                |
| 108 | -   | -   | -   | Edwardsiella phage PEi26_122 | 100 | 88 | conserved hypothetical protein                |
| 109 | 110 | 100 | 98  |                              |     |    | hypothetical protein                          |
| 110 | 111 | 100 | 100 |                              |     |    | hypothetical protein                          |
| 111 | 112 | 100 | 100 |                              |     |    | hypothetical protein                          |
| 112 | 113 | 100 | 99  |                              |     |    | hypothetical protein                          |
| 113 | 144 | 97  | 51  |                              |     |    | IP7                                           |
| -   | 114 | -   | -   | -                            | -   | -  | hypothetical protein                          |
| -   | 115 | -   | -   | Escherichia phage Av-05_183  | 94  | 37 | hypothetical protein                          |
| 114 | 116 | 100 | 99  |                              |     |    | endonuclease V N-glycosylase UV repair enzyme |
| 115 | 117 | 100 | 99  |                              |     |    | internal head protein                         |
| 116 | 118 | 100 | 100 |                              |     |    | hypothetical protein                          |

|     |     |     |     |                           |
|-----|-----|-----|-----|---------------------------|
| 117 | 119 | 100 | 99  | hypothetical protein      |
| 118 | 120 | 100 | 100 | nudix hydrolase           |
| 119 | 121 | 100 | 100 | hypothetical protein      |
| 120 | 122 | 100 | 53  | putative membrane protein |
| 121 | 123 | 100 | 93  | hypothetical protein      |
| 122 | 124 | 100 | 100 | hypothetical protein      |
| 123 | 125 | 100 | 99  | hypothetical protein      |
| 124 | 126 | 100 | 100 | hypothetical protein      |
| 125 | 127 | 100 | 100 | hypothetical protein      |
| 126 | 128 | 100 | 100 | hypothetical protein      |
| 127 | 129 | 100 | 100 | hypothetical protein      |
| 128 | 130 | 100 | 100 | hypothetical protein      |
| 129 | 131 | 100 | 100 | hypothetical protein      |
| 130 | 132 | 100 | 100 | hypothetical protein      |
| 131 | 133 | 100 | 99  | hypothetical protein      |
| 132 | 134 | 100 | 77  | hypothetical protein      |
| 133 | 135 | 100 | 98  | hypothetical protein      |
| 134 | 136 | 100 | 97  | hypothetical protein      |
| 135 | 137 | 100 | 99  | hypothetical protein      |
| 136 | 138 | 100 | 99  | hypothetical protein      |
| 137 | 139 | 100 | 100 | hypothetical protein      |
| 138 | 140 | 100 | 99  | hypothetical protein      |
| 139 | 141 | 100 | 100 | hypothetical protein      |
| 140 | 142 | 100 | 92  | hypothetical protein      |
| 141 | 143 | 100 | 69  | hypothetical protein      |
| 142 | 145 | 100 | 98  | hypothetical protein      |

|     |     |     |     |                              |     |     |                                               |
|-----|-----|-----|-----|------------------------------|-----|-----|-----------------------------------------------|
| 143 | 146 | 100 | 91  |                              |     |     | hypothetical protein                          |
| -   | 147 | -   | -   | Citrobacter phage Merlin_166 | 95  | 53  | hypothetical protein                          |
| 144 | 148 | 100 | 99  |                              |     |     | hypothetical protein                          |
| 145 | 149 | 100 | 100 |                              |     |     | chaperone for tail fiber formation            |
| 146 | 150 | 100 | 100 |                              |     |     | hypothetical protein                          |
| 147 | 151 | 100 | 99  |                              |     |     | tail completion and sheath stabilizer protein |
| 148 | -   | -   | -   | vB_EcoM_VR25_162             | 100 | 62  | hypothetical protein                          |
| 149 | 152 | 100 | 98  |                              |     |     | DNA end protector protein                     |
| 150 | 153 | 100 | 100 |                              |     |     | head completion protein                       |
| 151 | 154 | 100 | 100 |                              |     |     | hypothetical protein                          |
| 152 | 155 | 95  | 95  |                              |     |     | baseplate hub subunit and tail lysozyme       |
| 153 | -   | -   | -   | IME08_142                    | 100 | 95  | 5.1 gene product                              |
| 154 | -   | -   | -   | IME08_143                    | 100 | 100 | 5.4 gene product                              |
| -   | 156 | -   | -   | Bp7_254                      | 100 | 100 | hypothetical protein                          |
| 155 | 157 | 100 | 100 |                              |     |     | baseplate wedge subunit                       |
| 156 | 158 | 100 | 99  |                              |     |     | baseplate wedge initiator                     |
| 157 | 159 | 100 | 100 |                              |     |     | baseplate wedge subunit                       |
| 158 | 160 | 100 | 100 |                              |     |     | baseplate wedge tail fiber                    |
| 159 | 161 | 100 | 99  |                              |     |     | baseplate wedge subunit and tail pin          |
| 160 | 162 | 100 | 100 |                              |     |     | baseplate wedge subunit and tail pin          |
| 161 | 163 | 100 | 100 |                              |     |     | short tail fibers protein                     |
| 162 | 164 | 100 | 99  |                              |     |     | fibritin neck whiskers                        |
| 163 | 165 | 100 | 100 |                              |     |     | neck protein                                  |
| 164 | 166 | 100 | 100 |                              |     |     | neck protein                                  |
| 165 | 167 | 100 | 100 |                              |     |     | tail sheath stabilizer and completion protein |
| 166 | 168 | 100 | 97  |                              |     |     | terminase DNA packaging enzyme small subunit  |

|     |     |     |     |                             |     |     |                                                     |
|-----|-----|-----|-----|-----------------------------|-----|-----|-----------------------------------------------------|
| 167 | 169 | 100 | 100 |                             |     |     | terminase DNA packaging enzyme large subunit        |
| 168 | 170 | 100 | 98  |                             |     |     | tail sheath protein                                 |
| 169 | -   | -   | -   | Klebsiella phage PKO111_028 | 99  | 65  | hypothetical protein                                |
| 170 | 171 | 100 | 100 |                             |     |     | hypothetical protein                                |
| 171 | -   | -   | -   | Bp7_237                     | 100 | 100 | hypothetical protein                                |
| 172 | 172 | 100 | 100 |                             |     |     | hypothetical protein                                |
| 173 | 173 | 100 | 100 |                             |     |     | prohead core protein precursor                      |
| 174 | 174 | 100 | 100 |                             |     |     | prohead core protein                                |
| 175 | 175 | 100 | 100 |                             |     |     | prohead core scaffold protein and protease          |
| 176 | 176 | 100 | 99  |                             |     |     | prohead core scaffold protein                       |
| 177 | 177 | 100 | 99  |                             |     |     | major head protein                                  |
| 178 | 178 | 100 | 100 |                             |     |     | hypothetical protein                                |
| 179 | 179 | 100 | 99  |                             |     |     | head vertex protein                                 |
| 180 | 180 | 100 | 100 |                             |     |     | head vertex protein                                 |
| 181 | 181 | 100 | 84  |                             |     |     | RNA ligase 2                                        |
| 182 | 182 | 100 | 100 |                             |     |     | hypothetical protein                                |
| 183 | 183 | 100 | 98  |                             |     |     | head outer capsid protein                           |
| 184 | 184 | 100 | 99  |                             |     |     | inhibitor of prohead protease                       |
| 185 | 185 | 100 | 100 |                             |     |     | hypothetical protein                                |
| 186 | 186 | 100 | 100 |                             |     |     | hypothetical protein                                |
| 187 | 187 | 100 | 100 |                             |     |     | hypothetical protein                                |
| 188 | 188 | 100 | 100 |                             |     |     | hypothetical protein                                |
| 189 | 189 | 100 | 100 |                             |     |     | UvsY recombination repair and ssDNA binding protein |
| 190 | 190 | 100 | 100 |                             |     |     | baseplate hub subunit                               |
| 191 | 191 | 100 | 99  |                             |     |     | baseplate hub subunit                               |

|     |     |     |     |                 |    |    |                                      |
|-----|-----|-----|-----|-----------------|----|----|--------------------------------------|
| 192 | 192 | 100 | 100 |                 |    |    | baseplate hub assembly catalyst      |
| 193 | 193 | 100 | 100 |                 |    |    | aseplate hub subunit                 |
| 194 | 194 | 100 | 100 |                 |    |    | hypothetical protein                 |
| 195 | 195 | 100 | 99  |                 |    |    | baseplate hub subunit                |
| 196 | 196 | 100 | 99  |                 |    |    | baseplate tail tube cap              |
| 197 | 197 | 100 | 96  |                 |    |    | baseplate tail tube initiator        |
| 198 | 198 | 100 | 98  |                 |    |    | hypothetical protein                 |
| 199 | 199 | 100 | 98  |                 |    |    | RNA polymerase ADP-ribosylase        |
| 200 | 200 | 100 | 46  |                 |    |    | RNA polymerase ADP-ribosylase        |
| 201 | 200 | 99  | 99  |                 |    |    | RNA polymerase ADP-ribosylase        |
| 201 | 201 | 94  | 41  |                 |    |    | RNA polymerase ADP-ribosylase        |
| 202 | 202 | 100 | 98  |                 |    |    | hypothetical protein                 |
| 203 | 203 | 100 | 99  |                 |    |    | DNA ligase                           |
| 204 | 204 | 100 | 100 |                 |    |    | hypothetical protein                 |
| 205 | 205 | 100 | 99  |                 |    |    | hypothetical protein                 |
| 206 | 206 | 100 | 99  |                 |    |    | hypothetical protein                 |
| 207 | 207 | 100 | 57  |                 |    |    | hypothetical protein                 |
| 207 | 208 | 100 | 97  |                 |    |    | hypothetical protein                 |
| 208 | 209 | 100 | 98  |                 |    |    | hypothetical protein                 |
| 209 | -   | -   | -   | vB_EcoM_VR5_207 | 97 | 92 | hypothetical protein                 |
| 210 | 210 | 100 | 99  |                 |    |    | hypothetical protein                 |
| 211 | 211 | 100 | 98  |                 |    |    | hypothetical protein                 |
| 212 | 212 | 100 | 100 |                 |    |    | hypothetical protein                 |
| 213 | 213 | 100 | 100 |                 |    |    | hypothetical protein                 |
| 214 | 214 | 100 | 99  |                 |    |    | hypothetical protein                 |
| 215 | 215 | 100 | 100 |                 |    |    | head assembly cochaperone with GroEL |



|     |     |     |     |          |     |    |                                                  |
|-----|-----|-----|-----|----------|-----|----|--------------------------------------------------|
| 216 | 216 | 100 | 100 |          |     |    | hypothetical protein                             |
| 217 | 217 | 100 | 100 |          |     |    | hypothetical protein                             |
| 218 | 218 | 100 | 99  |          |     |    | hypothetical protein                             |
| 219 | 219 | 100 | 99  |          |     |    | hypothetical protein                             |
| 220 | 220 | 100 | 88  |          |     |    | hypothetical protein                             |
| 221 | 221 | 100 | 97  |          |     |    | hypothetical protein                             |
| 222 | 222 | 100 | 100 |          |     |    | hypothetical protein                             |
| 223 | 223 | 100 | 100 |          |     |    | hypothetical protein                             |
| 224 | -   | -   | -   | RB14_217 | 100 | 78 | hypothetical protein                             |
| 225 | 224 | 100 | 97  |          |     |    | PseT polynucleotide 5'-kinase and 3'-phosphatase |
| 226 | 225 | 100 | 100 |          |     |    | hypothetical protein                             |
| 227 | 226 | 100 | 100 |          |     |    | hypothetical protein                             |
| 228 | 227 | 100 | 100 |          |     |    | hypothetical protein                             |
| 229 | 228 | 100 | 99  |          |     |    | putative membrane protein                        |
| 230 | 229 | 100 | 100 |          |     |    | hypothetical protein                             |
| 231 | 230 | 100 | 100 |          |     |    | hypothetical protein                             |
| 232 | 231 | 100 | 100 |          |     |    | hypothetical protein                             |
| 233 | 232 | 100 | 99  |          |     |    | hypothetical protein                             |
| 234 | 233 | 100 | 99  |          |     |    | aerobic NDP reductase small subunit              |
| 235 | 234 | 100 | 99  |          |     |    | aerobic NDP reductase large subunit              |
| 236 | 235 | 74  | 99  |          |     |    | hypothetical protein                             |
| 237 | 236 | 100 | 100 |          |     |    | dTMP thymidylate synthase                        |
| 238 | 237 | 100 | 95  |          |     |    | dihydrofolate reductase                          |
| 239 | 238 | 100 | 100 |          |     |    | hypothetical protein                             |
| 240 | 239 | 100 | 100 |          |     |    | hypothetical protein                             |
| 241 | 240 | 100 | 100 |          |     |    | hypothetical protein                             |

|     |     |     |     |          |     |     |                                               |
|-----|-----|-----|-----|----------|-----|-----|-----------------------------------------------|
| 242 | 241 | 100 | 96  |          |     |     | hypothetical protein                          |
| 243 | 242 | 100 | 100 |          |     |     | hypothetical protein                          |
| 244 | 243 | 100 | 98  |          |     |     | hypothetical protein                          |
| 245 | 244 | 100 | 100 |          |     |     | late promoter transcription accessory protein |
| 246 | 245 | 100 | 100 |          |     |     | hypothetical protein                          |
| 247 | 246 | 100 | 99  |          |     |     | RNaseH ribonuclease                           |
| 248 | 247 | 100 | 98  |          |     |     | long tail fiber proximal subunit              |
| 249 | 248 | 100 | 99  |          |     |     | long tail fiber proximal connector            |
| 250 | 249 | 100 | 99  |          |     |     | long tail fiber distal connector              |
| 251 | 250 | 100 | 58  |          |     |     | long tail fiber distal subunit                |
| 252 | 251 | 100 | 99  |          |     |     | tail fiber adhesin                            |
| 253 | 252 | 100 | 100 |          |     |     | hypothetical protein                          |
| 254 | 253 | 100 | 100 |          |     |     | anti-sigma 70 protein                         |
| 255 | 254 | 100 | 93  |          |     |     | hypothetical protein                          |
| 256 | 255 | 100 | 97  |          |     |     | hypothetical protein                          |
| 257 | 256 | 100 | 98  |          |     |     | hypothetical protein                          |
| 258 | 257 | 100 | 85  |          |     |     | hypothetical protein                          |
| 259 | -   | -   | -   | RB32_252 | 100 | 90  | hypothetical protein                          |
| -   | 258 | -   | -   | Bp7_151  | 100 | 100 | hypothetical protein                          |
| 260 | 259 | 100 | 75  |          |     |     | hypothetical protein                          |
| 261 | 260 | 100 | 100 |          |     |     | hypothetical protein                          |
| 262 | 261 | 100 | 100 |          |     |     | hypothetical protein                          |
| 263 | 262 | 99  | 98  |          |     |     | topoisomerase II medium subunit               |
| 264 | 263 | 100 | 100 |          |     |     | hypothetical protein                          |
| 265 | 264 | 100 | 98  |          |     |     | putative membrane protein                     |
| 266 | 265 | 100 | 100 |          |     |     | nucleoid disruption protein                   |

|     |     |     |     |   |   |   |   |                         |
|-----|-----|-----|-----|---|---|---|---|-------------------------|
| 267 | 266 | 100 | 100 |   |   |   |   | hypothetical protein    |
| 268 | 267 | 100 | 100 |   |   |   |   | hypothetical protein    |
| 269 | 268 | 100 | 100 |   |   |   |   | putative inner membrane |
| 270 | 269 | 100 | 98  |   |   |   |   | hypothetical protein    |
| 271 | -   | -   | -   | - | - | - | - | hypothetical protein    |
| 272 | 270 | 100 | 100 |   |   |   |   | hypothetical protein    |
| 273 | 271 | 100 | 99  |   |   |   |   | hypothetical protein    |
| 274 | 272 | 100 | 100 |   |   |   |   | hypothetical protein    |
| 275 | 273 | 100 | 93  |   |   |   |   | hypothetical protein    |

---

103

104 **Table S4.** The DNA sequences of chimeric phages and mutants from the WQT chimeric phage

105

106 **WQT2**

107 ATGGCTACTTTAAAGCAAATCCAATTTAAAGAAGTAAAGTAGCCGGTGTACGTCCGGCACCGGCCA  
108 GTTGGCTGAAGGCGAACTGGCTATTAACCTAAAGGACCGTTTACTTTTTACTAAAGACGATACTGGAG  
109 CGATTATCGACCTTGGCTTTGCTAAGGGTGGAAATATCGATGGTAATGTTATTCATAAAGGCAATTACAA  
110 CAAAACCGGTAATTATAATCTGTCTGGTACTTTTACCCAAACAGGTAGTTATACGACATCCGGAAGTATA  
111 ACAGCAAATGGTGATATTACTGCAAAATCTCGCCTAATGACGGATATGGGCGAAGTTTTGGTACGTGGC  
112 AATGGTACCGCACATGTTTCGATTCCAGGATTTAGCTGATGCGCGGAAAGAGCTATAATTTATTCTCAA  
113 AACCGTACTGGGGATACCAAGCAAATCTGAACGTTCTGTTCAGGATTACACTAATTCGACATCTAAT  
114 ATTTTGCATTCAACGGCGACGGTTTATTTTATGCTCCGTCTATTTCCGCCGGAACATCAGTAAAATCTC  
115 CGGTAATTTATACTAATACTGTTAATACAGACAGTAAGAATATTGGCGATTATGATATATCTTCATTAGCA  
116 AATAATAATTCTGCCACGGATAAAAACCTATTTGCGCGTTGTACGTACCGACCCAGCGTCTGCAATACTT  
117 CATGAAATTTGTGAAAATAACGGTATCAGTTGGTATTCTGGTTCAACCCCTACTGATTATATGTTGTCTT  
118 TTGCTTATCCGGTGGTTTTCAAGCAGGTCATTCGATTGCAGTAAAGTATGGAATCAGGGCCTTTGACATA  
119 TTCAACCTTAGGTAAAGTTCTATTGTTCTTGGTGATAATGATACCGGGTTAAATGGAAACAAGACGG  
120 CCTGTTCTATACAATTAATAATGGAGCTTATACTTTACTTACAACCTCAACTGAAGTTACAAGCCTTAAA  
121 CAGTTAGTTGCGGGTTATTCAACCAACGGTTCTGATTTAATTCTTCTACAACCTCAAACTATCCATTAG  
122 TTATTGTTAATACTACTAATGATAAAAACAGCTTCGGCGACGGTCAAACCTTTTTAGGTTATCACCAGA  
123 GCGGCAAATATCACCATTATTTTCGTGGCAAAGGTGTAACAAACGTTAACACCGCCGGCGGGTTGTTG  
124 GTTACTCCTGGTAACGTTGAAGTCCGGGGCGGTTTCGGTTAATATTGATGGTCTCAGTAATGCTTCTACA  
125 GTGCTTTTTAAAGGAAATACTACAGGATATAGTTTCAGTCGATAATATAGAGCTCAAAGTTTGGGGTGAC  
126 ACTTTTAATACGGTAGGTGGTTCTCGTAAAAACGTAATGGAAACATCTGATGCTACTGGCTGGATGCAT  
127 TATATTCAACGAACTACAGAAGGTAAAGTCAATCCTATTTAAATGGTACCATGAATGTAATTGAAGGA  
128 TTGACTGTCAATCAAGATACATCCTTAAAACGTAATCTGTATGTTTCCAATGAAATTAAGTTTCGCGCTG  
129 CTAGTGGTCTTCGTATTTGGAACGATAAGTATGGTGTATTTTTTCGAAATTCGGAAGACCAACTGCATAT  
130 TATCCGACCAATGCCAATGCCGGCGAAAGTGGTGGATTGGGCCATTACGACCGTTAAGTATTACATT  
131 AGACACCGGCATAGTTAAAATTCCTAACTTAGCAGCCAACCAGGTTTCTTTTAGTAGCACAGGTGTATT  
132 GGAATTCATCGCCGTAACGGTTCATCTTATGCTAACCAGAACACAACCTAAAGCTCCATTGTATCAAAC  
133 GCTTGGTTCTGCGACTCAAGCATTCTATCCTATTACTAAGCAGAAAAATACAGTTTCTAACGTAACTGTT  
134 ACTCAAGGTATGGACCGAGCTACGAGCGAATACCGAATTGTTGCTCAAGGTGATTTGCTTGGTGATGG  
135 TGATGCTACAGGATTGCAATACTGGCGATTTACCAAAGAAGGTAACCTTATAACTCGGAACCGCTTATA  
136 TGCCGGTACAGCTTTCATGAATACCGATGGTAATATTGCAGGTTCTATTTGGAACAAGTATAGCGGTGCT  
137 ACTAACCTTGATGCTGCAGTGAATACTCGTGTTGGTAAAGGCGGCGATAAATGACTGGCAAATTAATC  
138 GTTAAAAGAGGCTCTGACGCTATTAACATTGCTGCCGATGAAAATGATTCTGCTTATTTACTTGGAAACA  
139 TCGGGTGGAGCGAATTCGTGGTACATCGTAAAGGCGGAGCAGATGACACTGCTTCATTTTATAATTC  
140 AAAACTACCGCAGGAATTACTCTTAATAGTGAGGCGATATTGATTTAATGTTAAAAACAATCTACTG  
141 CAGCTTCATTAATTTTTATCGTTTATATTTAAACGGAAGACAGTGGACAGCTACTCAAGGCCACGGAT  
142 ATAATAATCAATGGCAAACAGAAGCCCATCTTCGTTGACTTTGGTGAATCTGTTCCGAAAGATAGTT  
143 ATATGCCAATTATCAAAGGAAAAAGCCAAATCATTAACGAAGGATATGCCACAAAGGCAGATTTTGGTA  
144 TTATTAGATTGGGCGGAGATGCTACTTGGGGAAATGCAGTAATTCGTGTTGGTTCTGCGGAAAGTGGA  
145 GATAGCAGTCATCCTAATGCAATATTTGTGTTTCAGGCTAATGGCGATTTTAAAGCTCCGGCTGGTCTTC  
146 GCGCTGGTGTTAACTTGGGTGTCGGTACAATCCAGCATGGGGCGGAGCATCTATCGCCATTGGGGAC

147 GATGACACCGGCTTGGTCCATGGCGGTGACGGCCGAATTAATATGTATGCCAATAGTATGCATATTGCA  
148 AGCTGGGGAGCTGGTTACCATATCCATGAAGGTCTTTGGGATACCACTGGTGCCTTGTGGACTGAAAC  
149 AGGAAGAGCTATTATTTCTTTTGGTCATTTAGTCCAACAAAACGATAGCTATTCAACATTTGTTTCGTGAC  
150 GTTTATGTTTCGTTCTGATATTCGTGTTAAAAAAGACCTTGTTAAATTTGAAAATGCTTCACAGACACTTT  
151 CAAAAATTAACGGTTACACTTATATGCAGAAACGTGGCCTGGATGAAGAAGGTAATCAGAAATGGGAA  
152 CCTAATGCCGGTTTAATTGCTCAAGAAGTTCAAGCTATTTTACCTGAATTGGTTGAAGGGGACCCCTGAC  
153 GGTGAAGCTTTACTTCGTTTAAACTATAACGGTGTAAATTGGTTTAAATACAGCTGCAATCAATGAGCAC  
154 ACTGCAGAAATAGCAGAATTGAAATCAGAGATTGAAGAACTTAAAGCACTAATTAATCATTGTTAAA  
155 ATAA

156

157 **WQT3**

158 ATGGCTACTTTAAAGCAAATCCAATTTAAAGAAGTAAAGTAGCCGGTGTACGTCCGGCACCGGCCCA  
159 GTTGGCTGAAGGCGAACTGGCTATTAACTTAAAGGACCGTTTACTTTTACTAAAGACGATACTGGAG  
160 CGATTATCGACCTTGGCTTTGCTAAGGGTGGAAATATCGATGGTAATGTTATTCAAAAAGGCAATTACAA  
161 CCAAACCGTAATTATAATCTGTCTGGTACTTTTACCCAAACAGGTAGTTATACGACATCCGGAAGTATA  
162 ACAGCAAATGGTGATATTACTGCAAAATCTCGCCTAATGACGGATATGGGCGAAGTTTTGGTACGTGGC  
163 AATGGTACCGCACATGTTTCGATTCCAGGATTTAGCTGATGCGCGCGAAAGAGCTATAATTTATTCTCAA  
164 AACCGTACTGGGGATACCAAGCAAATCTTGAACGTTTCGTGTTTCAGGATTACACTAATTCGACATCTAAT  
165 ATTTTTGCATTCAACGGCGACGGTTTATTTTATGCTCCGTCTATTTCCGCCGGAACATCAGTAAAATCTC  
166 CGGTAATTTATACTAATACTGTTAATACAGACAGTAAGAATATTGGCGATTATGATATATCTTCATTAGCA  
167 AATAATAATTCTGCCACGGATAAAAACCTATTTGCGCGTTGTACGTACCGACCCAGCGTCTGCAATACTT  
168 CATGAAATTTGTGAAAATAACGGTATCAGTTGGTATTCTGGTTCAACCCCTACTGATTATATGTTGTCTT  
169 TTGCTTATCCGGTGGTTTTCAAGCAGGTCATTCGATTGCAGTAGGTATGGAATCAGGGCCTTTGACATA  
170 TTCAACCTTAGGTAAAGGTTCTATTGTTCTTGGTGATAATGATACCGGGTTTAAATGGAAACAAGACGG  
171 CCTGTTCTATACAATTAATAATGGAGCTTATACTTTACTTACAACCTCCAACTGAAGTTACAAGCCTTAAA  
172 CAGTTAGTTGCGGGTTATTCAACCAACGGTTCTGATTTAATTCTTCTACAACCTCAAACCTATCCATTAG  
173 TTATTGTTAATACTACTAATGATAAAAACAGCTTCGCGCAGCGTCAAACCTCTTTTAGGTTATCACCAGA  
174 GCGGCAAATATCACCATTATTTTCGTGGCAAAGGTGTAACAAACGTTAACACCGCCGGCGGGTTGTTG  
175 GTTACTCCTGGTAACGTTGAAGTCCGGGGCGGTTTCGGTTAATATTGATGGTCTCAGTAATGCTTCTACA  
176 GTGCTTTTTAAAGGAAATACTACAGGATATAGTTTCAGTCGATAATATAGAGCTCAAAGTTTGGGGTGAC  
177 ACTTTTAATACGGTAGGTGGTTCTCGTAAAAACGTAATGGAAACATCTGATGCTACTGGCTGGATGCAT  
178 TATATTCAACGAACTACAGAAGGTAAAGTCAATCCTATTTAAATGGTACCATGAATGTAATTGAAGGA  
179 TTGACTGTCAATCAAGATACATCCTTAAAACGTAATCTGTATGTTTCCAATGAAATTAAGTTTCGCGCTG  
180 CTAGTGGTCTTCGTATTTGGAACGATAAGTATGGTGTATTTTTCGAAATTCGGAAGACCAACTGCATAT  
181 TATCCGACCAATGCCAATGCCGGCGAAAGTGGTGGATTGGGCCATTACGACCGTTAAGTATTACATT  
182 AGACACCGGCATAGTTAAAATTCCTAACTTAGCAGCCAACCAGGTTTCTTTTAGTAGCACAGGTGTATT  
183 GGAATTCATCGCCGTAACGGTTCATCTTATGCTAACCAGAACACAACCTAAAGCTCCATTGTATCAAAC  
184 GCTTGGTTCTGCGACTCAAGCATTCTATCCTATTAAGCAGAAAAATACAGTTTCTAACGTAACCTGTT  
185 ACTCAAGGTATGGACCGAGCTACGAGCGAATACCGAATTGTTGCTCAAGGTGATTTGCTTGGTGATGG  
186 TGATGCTACAGGATTGCAATACTGGCGATTTACCAAAGAAGGTAACCTTATAACTCGGAACCGCTTATA  
187 TGCCGGTACAGCTTTCATGAATACCGATGGTAATATTGCAGGTTCTATTTGGAACAAGTATAGCGGTGCT  
188 ACTAACCTTGATGCTGCAGTGAATACTCGTGTTGGTAAAGGCGGCGATACAATGACTGGCAAATTAATC  
189 GTTAAAAGAGGGCTCTGACGCTATTAACATTGCTGCCGATGAAAATGATTCTGCTTATTTACTTGGAAACA  
190 TCGGGTGGAGCGAATTCGTGGTACATCGGTAAAGGCGGAGCAGATGACACTGCTTCATTTTATAATTC

191 AAAACTACCGCAGGAATTACTCTTAATAGTGTAGGGGATATTGATTTTAATGTTAAAAACAATCTACTG  
192 CAGCTTCATTAATTTTTATCGTTTATATTTAAACGGAAGACAGTGGACAGCTACTCAAGGCCACGGAT  
193 ATAATAATCAATGGCAAACAGAAAGCCCATCTTCGTTGACTTTGGTGAATCTGTTCCGAAAGATAGTT  
194 ATATGCCAATTATCAAAGGAAAAAGCCAAATCATTAACGAAGGATATGCCACAAAGGCAGATTTTGGTA  
195 TTATTAGATTGGGCGGAGATGCTACTTGGGGAAATGCAGTAATTCGTGTTGGTTCTGCGGAAAGTGGA  
196 GATAGCAGTCATCCTAATGCAATATTTGTGTTTCAGGCTAATGGCGATTTTAAAGCTCCGGCTGGTCTTC  
197 GCGCTGGTGTTAACTTGGGTGTCGGTACAATCCAGCATGGGGCGGAGCATCTATCGCTATTGGTGATA  
198 ACGACACAGGTTTAGTCCATGGTGGTGACGGCCGAATTAATATGTATGCCAATAGTATGCATATTGCAA  
199 GCTGGGGAAGCCGGTTACCATATCCATGAAGGTCTTTGGGATACCACTGGTGCCTTGTGGACTGAAACA  
200 GGAAGAGCTATTATTTCTTTGGTCATTTAGTCCAACAAAACGATAGCTATTCAACATTTGTTCGTGACG  
201 TTTATGTTCTGTTCTGATATTCGTGTTAAAAAGACCTTGTTAAATTTGAAAATGCTTCACAGACACTTTC  
202 AAAAATTAACGGTTACACTTATATGCAGAAACGTGGCCTGGATGAAGAAGGTAATCAGAAATGGGAAC  
203 CTAATGCCGGTTTAAATTGCTCAAGAAGTTCAAGCTATTTTACCTGAATTGGTTGAAGGCGACCCCTGACG  
204 GTGAAGCTTTACTTTCGTTTAAACTATAACGGTGTAATTGGTTTAAATACAGCTGCAATCAATGAGCACA  
205 CTGCAGAAATAGCAGAATTGAAATCAGAGATTGAAGAACTTAAAGCACTAATTAATCATTGTTAAAT  
206 AA

207

208 **WQT4**

209 ATGGCTACTTTAAAGCAAATCCAATTTAAAAGAAGTAAAGTAGCCGGTGTACGTCCGGCACCGGCCCA  
210 GTTGGCTGAAGGCGAACTGGCTATTAACTTAAAGGACCGTTTACTTTTACTAAAGACGATACTGGAG  
211 CGATTATCGACCTTGGCTTTGCTAAAGGCGGTAATATCGACGGAACGTTATTCATAACGGTAACTACA  
212 CTCAAACCGGTAATTATAATCTGTCTGGTACTTTTACCCAAACAGGTAGTTATACGACATCCGGAAGTAT  
213 AACAGCAAATGGTGATTAATCTGCAAAATCTCGCCTAATGACGGATATGGGCGAAGTTTGGTACGTGG  
214 CAATGGTACCGCATGTTTCGATTCCAGGATTTAGCTGATGCGCGGAAAGAGCTATAATTTATTCTCA  
215 AAACCGTACTGGGGATACCAAGCAAATCTTGAACGTTTCGTGTTTCAGGATTACACTAATTCGACATCTAA  
216 TATTTTTGCATTCAACGGCGACGGTTTATTTATGCTCCGCTATTTCCGCCGGAACATCAGTAAAATCT  
217 CCGGTAATTTATACTAATACTGTTAATACAGACAGTAAGAATATTGGCGATTATGATATATCTTCATTAGC  
218 AAATAATAATTCTGCCACGGATAAAAATTTGCGCGTTGTACGTACCGACCCAGCGTCTGCAATACT  
219 TCATGAAATTTGTGAAAATAACGGTATCAGTTGGTATTCTGGTTCAACCCCTACTGATTATATGTTGTCT  
220 TTTGCTTATCCGGTGGTTTTCAAGCAGGTCATTGATTGCAGTAGGTATGGAATCAGGGCCTTTGACAT  
221 ATTC AACCTTAGGTAAAGGTTCTATTGTTCTTGGTGATAATGATACCGGGTTTAAATGGAAACAAGACG  
222 GCCTGTTCTATAACAATTAATAATGGAGCTTATACTTTACTTACAACCTCCAACCTGAAGTTACAAGCCTTAA  
223 ACAGTTAGTTGCGGGTATTCAACCAACGGTTCTGATTAAATCTTCTTACAACCTCAAACTATCCATTA  
224 GTTATTGTTAATACTACTAATGATAAAAACAGCTTCGCGACGGTCAAACCTTTTTAGGTTATCACCAG  
225 AGCGGCAAATATCACCATTATTTTCGTGGCAAAGGTGTAACAAACGTTAACACCGCCGGCGGGTTGTT  
226 GGTTACTCCTGGTAACGTTGAAGTCCGGGGCGGTTCCGGTTAATATTGATGGTCTCAGTAATGCTTCTAC  
227 AGTGCTTTTTAAAGGAAATACTACAGGATATAGTTCAGTCGATAATATAGAGCTCAAAGTTTGGGGTGA  
228 CACTTTTAATACGGTAGGTGGTTCTCGTAAAAACGTAATGGAAACATCTGATGCTACTGGCTGGATGCA  
229 TTATATCAACGAACACAGAAGGTAAAGTCGAATCCTATTTAAATGGTACCATGAATGTAATTGAAGG  
230 ATTGACTGTCAATCAAGATACATCCTTAAAACGTAATCTGTATGTTTCCAATGAAATTAAGTTCGCGCT  
231 GCTAGTGGTCTTCGTATTTGGAACGATAAGTATGGTGTATTTTTCGAAATTCGGAAGACCAACTGCATA  
232 TTATCCGACCAATGCCAATGCCGGCGAAAGTGGTGGATTGGGCCATTACGACCGTTAAGTATTACAT  
233 TAGACACCGGCATAGTTAAAATTCCTAACTTAGCAGCCAACCAGGTTTCTTTTAGTAGCACAGGTGTAT  
234 TGGAATTCATCGCCGGTAACGGTTCATCTTATGCTAACGAAACACAACCTAAAGCTCCATTGTATCAA

235 CGCTTGGTTCTGCGACTCAAGCATTCTATCCTATTAAGCAGAAAAATACAGTTTCTAACGTAACGTG  
236 TTAAGGTATGGACCGAGCTACGAGCGAATACCGAATTGTTGCTCAAGGTGATTTGCTTGGTGATG  
237 GTGATGCTACAGGATTGCAATACTGGCGATTTACCAAAGAGGTAACCTTATAACTCGGAACCGCTTAT  
238 ATGCCGGTACAGCTTTCATGAATACCGATGGTAATATTGCAGGTTCTATTTGGAACAAGTATAGCGGTGC  
239 TACTAACCTTGATGCTGCAGTGAATACTCGTGTGGTAAAGGCGGCGATACAATGACTGGCAAATTAAT  
240 CGTAAAAAGAGGCTCTGACGCTATTAACATTGCTGCCGATGAAAATGATTCTGCTTATTTACTTGGAAC  
241 ATCGGGTGGAGCGAATTCGTGGTACATCGGTAAAGGCGGAGCAGATGACTGCTTCATTTTATAATTT  
242 CAAAACCTACCGCAGGAATTACTCTTAATAGTGTAGGCGATATTGATTTTAATGTAAAAACAATCTACT  
243 GCAGCTTCATTAATTTTTATCGTTTATATTTAAACGGAAGACAGTGGACAGCTACTCAAGGCCACGGA  
244 TATAATAATCAATGGCAAACAGAAGCCCCATTCTTCGTTGACTTTGGTGAATCTGTTCCGAAAGATAGT  
245 TATATGCCAATTATCAAAGGAAAAAGCCAAATCATTAACGAAGGATATGCCACAAAGGCAGATTTTGGT  
246 ATTATTAGATTGGGCGGAGATGCTACTTGGGGAAATGCAGTAATTCGTGTTGGTTCTGCGGAAAGTGGA  
247 GATAGCAGTCATCCTAATGCAATATTTGTGTTTCAGGCTAATGGCGATTTAAAGCTCCGGCTGGTCTTC  
248 GCGCTGGTGTTAACTTGGGTGTCGGTACAATTCAGCATGGGGCGGAGCATCTATCGCCATTGGGGAC  
249 GATGACACCGGCTTGGTCCATGGTGGTGACGGCCGAATTAATATGTATGCCAATAGTATGCATATTGCAA  
250 GCTGGGGA<sup>GCC</sup>GGTTACCATATCCATGAAGGCTTTGGGATAACCACTGGTGCCTTGTGGACTGAAACA  
251 GGAAGAGCTATTATTTCTTTTGGTCATTTAGTCCAACAAAACGATAGCTATTCAACATTTGTTCGTGACG  
252 TTTATGTTTCGTTCTGATATTCGTGTTAAAAAGACCTTGTAAATTTGAAAATGCTTCACAGACACTTTC  
253 AAAAAATTAACGGTTACACTTATATGCAGAAACGTGGCCTGGATGAAGAAGGTAATCAGAAATGGGAAC  
254 CTAATGCCGGTTTAATTGCTCAAGAAGTTCAAGCTATTTTACCTGAATTGGTTGAAGGCGACCCCTGACG  
255 GTGAAGCTTTACTTTCGTTTAAACTATAACGGTGTAAATGGTTTAAATACAGCTGCAATCAATGAGCACA  
256 CTGCAGAAATAGCAGAATTGAAATCAGAGATTGAAGAACTTAAAGCACTAATTAATCATTGTTAAAT  
257 AA

258

259 **WQT5**

260 ATGGCTACTTTAAAGCAAATCCAATTTAAAGAAAGTAAAGTAGCCGGTGTACGTCCGGCACCGGCCCA  
261 GTTGGCTGAAGGCGAACTGGCTATTAACCTTAAAGGACCGTTTACTTTTTACTAAAGACGATACTGGAG  
262 CGATTATCGACCTTGGCTTTGCTAAAGGCGGTAATATCGACGGAAACGTTATTCATAACGGTAACTACA  
263 CTCAAACCGGTAATTATAATCTGTCTGGTACTTTTACCAAACAGGTAGTTATACGACATCCGGAAGTAT  
264 AACAGCAAATGGTGATTAATGCAAAAATCTCGCCTAATGACGGATATGGGCGAAGTTTGGTACGTGG  
265 CAATGGTACCGCACATGTTTCGATTCCAGGATTTAGCTGATGCGCGGAAAGAGCTATAATTTATTCTCA  
266 AAACCGTACTGGGGATACCAAGCAAATCTTGAACGTTTCGTGTTTCAGGATTACACTAATTCGACATCTAA  
267 TATTTTGCATTCAACGGCGACGGTTTATTTATGCTCCGCTATTTCCGCCGGAACATCAGTAAAAATCT  
268 CCGGTAATTTATACTAATACTGTAAATACAGACAGTAAGAATATTGGCGATTATGATATATCTTCATTAGC  
269 AAATAATAATTCTGCCACGGATAAAAACTATTTGCGCGTTGTACGTACCGACCCAGCGTCTGCAATACT  
270 TCATGAAATTTGTGAAAATAACGGTATCAGTTGGTATTCTGGTTCAACCCCTACTGATTATATGTTGTCT  
271 TTTGCTTATCCGGTGGTTTTCAAGCAGGTCATTGATTGCAGTAGGTATGGAATCAGGGCCTTTGACAT  
272 ATTCAACCTTAGGTAAAGGTTCTATTGTTCTTGGTGATAATGATACCGGGTTTAAATGGAAACAAGACG  
273 GCCTGTTCTATACAATTAATAATGGAGCTTATACTTTACTTACAACCTCAACTGAAGTTACAAGCCTTAA  
274 ACAGTTAGTTGCGGGTATTCAACCAACGGTTCGATTTAATTCTTCCTACAACCTCAAACTATCCATTA  
275 GTTATTGTTAATACTACTAATGATAAAAACAGCTTCGGCGACGGTCAAACCTCTTTTAGGTTATCACCAG  
276 AGCGGCAAATATCACCAATTATTTTCGTGGCAAAGGTGTAACAAACGTTAACACCGCCGGCGGGTTGTT  
277 GGTTACTCCTGGTAAACGTTGAAGTCCGGGGCGGTTTCGGTTAATATTGATGGTCTCAGTAATGCTTCTAC  
278 AGTGCTTTTTAAAGGAAATACTACAGGATATAGTTCAGTCGATAATATAGAGCTCAAAGTTGGGGTGA

279 CACTTTTAATACGGTAGGTGGTTCTCGTAAAAACGTAATGGAAACATCTGATGCTACTGGCTGGATGCA  
280 TTATATCAACGAACACAGAAGGTAAAGTCGAATCCTATTTAAATGGTACCATGAATGTAATTGAAGG  
281 ATTGACTGTCAATCAAGATACATCCTTAAAACGTAATCTGTATGTTTCCAATGAAATTAAGTTCGCGCT  
282 GCTAGTGGTCTTCGTATTTGGAACGATAAGTATGGTGTATTTTTTCGAAATTCGGAAGACCAACTGCATA  
283 TTATCCGACCAATGCCAATGCCGGCGAAAGTGGTGGATTGGGCCATTACGACCGTTAAGTATTACAT  
284 TAGACACCGGCATAGTTAAAATTCCTAACTTAGCAGCCAACCAGGTTTCTTTTAGTAGCACAGGTGTAT  
285 TGGAATTCATCGCCGGTAACGGTTCATCTTATGCTAACCCAGAACAACAACTAAAGCTCCATTGTATCAAA  
286 CGCTTGGTTCTGCGACTCAAGCATTCTATCTATTAAGCAGAAAAATACAGTTTCTAACGTAACCTG  
287 TTAACAAGGTATGGACCGAGCTACGAGCGAATACCGAATTGTTGCTCAAGGTGATTGCTTGGTGATG  
288 GTGATGCTACAGGATTGCAATACTGGCGATTTACCAAAGAAGGTAACTTATAACTCGGAACCGCTTAT  
289 ATGCCGGTACAGCTTTCATGAATACCGATGGTAATATTGCAGGTTCTATTTGGAACAAGTATAGCGGTGC  
290 TACTAACCTTGATGCTGCAGTGAATACTCGTGTGGTAAAGGCGCGATACAATGACTGGCAAATTAAT  
291 CGTTAAAAGAGGCTCTGACGCTATTAACATTGCTGCCGATGAAAATGATTCTGCTTATTTACTTGGAAC  
292 ATCGGGTGGAGCGAATTCGTGGTACATCGGTAAAGGCGGAGCAGATGACTGCTTCATTTTATAATTT  
293 CAAAACCTACCGCAGGAATTACTCTTAATAGTGTAGGCGATATTGATTTAATGTAAAAACAATCTACT  
294 GCAGCTTCATTAATTTTTATCGTTTATTTAAACGGAAGACAGTGGACAGCTACTCAAGGCCACGGA  
295 TATAATAATCAATGGCAAACAGAAGCCCCATTCTTCGTTGACTTTGGTGAATCTGTTCCGAAAGATAGT  
296 TATATGCCAATTATCAAAGGAAAAAGCCAAATCATTAACGAAGGATATGCCACAAAGGCAGATTTTGGT  
297 ATTATTAGATTGGGCGGAGATGCTACTTGGGGAAATGCAGTAATTCGTGTTGGTTCTGCGGAAAGTGGA  
298 GATAGCAGTCATCCTAATGCAATATTTGTGTTTCAGGCTAATGGCGATTTTAAAGCTCCGGCTGGTCTTC  
299 GCGCTGGTGTTAACTTGGGTGTCGGTACAATTCAGCATGGGGCGGAGCATCTATCGCCATTGGGGAC  
300 GATGACACCGGCTTGGTCCATGGCGGTGACGGCCGAATTAATATGTATGCCAATAGTATGCATATTGCA  
301 AGCTGGGGA **GCC**GGTTACCATATCCATGAAGGTCTTTGGGATACCACTGGTGCCTTGTGGACTGAAAC  
302 AGGAAGAGCTATTATTTCTTTTGGTCATTTAGTCCAACAAAACGATAGCTATTCAACATTTGTTCTGTGAC  
303 GTTTATGTTCTGTTCTGATATTCTGTGTTAAAAAAGACCTTGTTAAATTTGAAAATGCTTCACAGACACTTT  
304 CAAAAATTAACGGTTACTTATATGCAGAAACGTGGCTGGATGAAGAAGGTAATCAGAAATGGGAA  
305 CCTAATGCCGGTTAATTGCTCAAGAAGTTCAAGCTATTTTACCTGAATTGGTTGAAGGCGACCTGAC  
306 GGTGAAGCTTTACTTCGTTTAAACTATAACGGTGTAAATTGGTTTAAATACAGCTGCAATCAATGAGCAC  
307 ACTGCAGAAATAGCAGAATTGAAATCAGAGATTGAAGAACTTAAAGCACTAATTAATCATTGTAAAA  
308 ATAA

309

310 **WQT6**

311 ATGGCTACTTTAAAGCAAATCCAATTTAAAGAAGTAAAGTAGCCGGTGTACGTCCGGCACCGGCCCA  
312 GTTGGCTGAAGGCGAACTGGCTATTAACCTAAAGGACCGTTTACTTTTTACTAAAGACGATACTGGAG  
313 CGATTATCGACCTTGGCTTTGCT **AAGGGTGGAA**AATATC **GATGGTAAT**GTTATTCA **AAAGGCAAT**TACAA  
314 **C**CAAACCGTAATTATAATCTGTCTGGTACTTTTACCCAAACAGGTAGTTATACGACATCCGGAAGTATA  
315 ACAGCAAATGGTGATATTACTGCAAAATCTCGCCTAATGACGGATATGGGCGAAGTTTGGTACGTGGC  
316 AATGGTACCGCACATGTTTCGATTCCAGGATTTAGCTGATGCGCGGAAAGAGCTATAATTTATTCTCAA  
317 AACCGTACTGGGATACCAAGCAAATCTTGAACGTTCTGTTCAGGATTACACTAATTCGACATCTAAT  
318 ATTTTGCATCAACGGCGACGGTTTATTTATGCTCCGCTATTTCCGCCGGAACATCAGTAAAAATCTC  
319 CGGTAATTTATACTAATACTGTTAATACAGACAGTAAGAATATTGGCGATTATGATATATCTTCATTAGCA  
320 AATAATAATTCTGCCACGGATAAAAACCTATTTGCGCGTTGTACGTACCGACCCAGCGTCTGCAATACTT  
321 CATGAAATTTGTGAAAATAACGGTATCAGTTGGTATTCTGGTTCAACCCCTACTGATTATATGTTGTCTT  
322 TTGCTTATCCGGTGGTTTTCAAGCAGGTCATTCGATTGCAGTAGGTATGGAATCAGGGCCTTTGACATA



323 TTCAACCTTAGGTAAAGGTTCTATTGTTCTTGGTGATAATGATACCGGGTTTAAATGGAAACAAGACGG  
324 CCTGTTCTATAACAATTAATAATGGAGCTTATACTTTACTTACAACCTCCAAGTTACAAGCCTTAAA  
325 CAGTTAGTTGCGGGTTATTCAACCAACGGTCTGATTTAATTCTTCCTACAACCTCAAAACTATCCATTAG  
326 TTATTGTTAATACTACTAATGATAAAAACAGCTTCGGCGACGGTCAAACCTCTTTTAGGTTATCACCAGA  
327 GCGGCAAATATCACCATTATTTTCGTGGCAAAGGTGTAACAAACGTTAACACCGCCGGCGGGTTGTTG  
328 GTTACTCCTGGTAACGTTGAAGTCCGGGGCGGTTCCGGTTAATATTGATGGTCTCAGTAATGCTTCTACA  
329 GTGCTTTTTAAAGGAAATACTACAGGATATAGTTCAGTCGATAATATAGAGCTCAAAGTTTGGGGTGAC  
330 ACTTTTAATACGGTAGGTGGTTCTCGTAAAAACGTAATGGAAACATCTGATGCTACTGGCTGGATGCAT  
331 TATATTCAACGAACTACAGAAGGTAAAGTCGAATCCTATTTAAATGGTACCATGAATGTAATTGAAGGA  
332 TTGACTGTCAATCAAGATACATCCTTAAAACGTAATCTGTATGTTCCAATGAAATTAAGTTCGCGCTG  
333 CTAGTGGTCTTCGTATTTGGAACGATAAGTATGGTGTATTTTTCGAAATTCGGAAGACCAACTGCATAT  
334 TATTCCGACCAATGCCAATGCCGGCGAAAGTGGTGGATTGGGCCATTACGACCGTTAAGTATTACATT  
335 AGACACCGGCATAGTTAAAATTCCTAACTTAGCAGCCAACCAGGTTTCTTTTAGTAGCACAGGTGTATT  
336 GGAATTCATCGCCGGTAACGGTTCATCTTATGCTAACCAGAACACAACCTAAAGCTCCATTGTATCAAAC  
337 GCTTGGTTCTGCGACTCAAGCATTCTATCCTATTACTAAGCAGAAAAATACAGTTTCTAACGTAACCTGTT  
338 ACTCAAGGTATGGACCGAGCTACGAGCGAATACCGAATTGTTGCTCAAGGTGATTTGCTTGGTGATGG  
339 TGATGCTACAGGATTGCAATACTGGCGATTTACCAAAGAAGGTAACCTTATAACTCGGAACCGCTTATA  
340 TGCCGGTACAGCTTTCATGAATACCGATGGTAATATTGCAGGTTCTATTTGGAACAAGTATAGCGGTGCT  
341 ACTAACCTTGATGCTGCAGTGAATACTCGTGTGGTAAAGGCGGCGATAACAATGACTGGCAAATTAATC  
342 GTTAAAAGAGGCTCTGACGCTATTAACATTGCTGCCGATGAAAATGATTCTGCTTATTTACTTGAACA  
343 TCGGGTGGAGCGAATTCGTGGTACATCGGTAAAGGCGGAGCAGATGACACTGCTTCATTTTATAATTC  
344 AAAACTACCGCAGGAATTACTCTTAATAGTGTAGGCGATATTGATTTAATGTTAAAAACAATCTACTG  
345 CAGCTTCATTAATTTTTATCGTTTATATTTAAACGGAAGACAGTGGACAGCTACTCAAGGCCACGGAT  
346 ATAATAATCAATGGCAAACAGAAGCCCCATTCTTCGTTGACTTTGGTGAATCTGTTCCGAAAGATAGTT  
347 ATATGCCAATTATCAAAGGAAAAAGCCAAATCATTAAACGAAGGATATGCCACAAAGGCAGATTTTGGTA  
348 TTATTAGATTGGGCGGAGATGCTACTTGGGGAAATGCAGTAATTCGTGTTGGTTCTGCGGAAAGTGGA  
349 GATAGCAGTCATCCTAATGCAATATTTGTGTTTCAGGCTAATGGCGATTTTAAAGCTCCGGCTGGTCTTC  
350 GCGCTGGTGTTAACTTGGGTGTCGGTACAATTCAGCATGGGGCGGAGCATCTATCGCCATTGGGGAC  
351 GATGACACCGGCTTGGTCCATGGCGGTGACGGCCGAATTAATATGTATGCCAATAGTATGCATATTGCA  
352 AGCTGGGGAGCTGGTTACCATATCCATGAAGGTCTTGGGATACCACTGGTGCCTTGTGGACTGAAAC  
353 AGGAAGAGCTATTATTTCTTTTGGTCATTTAGTCCAACAAAACGATAGCTATTCAACATTTGTTCTGTGAC  
354 GTTTATGTTCTGTTCTGATATTCTGTGTTAAAAAAGACCTTGTTAAATTTGAAAATGCTTCACAGACACTTT  
355 CAAAAATTAACGGTTACACTTATATGCAGAAACGTGGCCTGGATGAAGAAGGTAATCAGAAATGGGAA  
356 CCTAATGCCGGTTAATTGCTCAAGAAGTTCAAGCTATTTTACCTGAATTGGTTGAAGGCGACCTGAC  
357 GGTGAAGCTTACTTCGTTTAAACTATAACGGTGTAAATTGGTTTAAATACAGCTGCAATCAATGAGCAC  
358 ACTGCAGAAATAGCAGAATTGAAATCAGAGATTGAAGAACTTAAAGCACTAATTAATCATTGTTAAA  
359 ATAA

360

361 **WQT7**

362 ATGGCTACTTTAAAGCAAATCCAATTTAAAGAAGTAAAGTAGCCGGTGTACGTCCGGCACCGGCCCA  
363 GTTGGCTGAAGGCGAACTGGCTATTAACCTAAAGGACCGTTTACTTTTTACTAAAGACGATACTGGAG  
364 CGATTATCGACCTTGGCTTTGCTAAAGGCGGTAATATCGACGGAAACGTTATTCATAACGGTAACTACA  
365 CTCAAACCGGT(AATTATAATCTGTCTGGTACTTTTACCCAAACAGGT)AGTTATACGACATCCGGAAGT  
366 ATAACAGCAAATGGTGATTAATGCAAAAATCTCGCCTAATGACGGATATGGGCGAAGTTTTGGTACGT

367 GGCAATGGTACCGCACATGTTTCGATTCCAGGATTTAGCTGATGCGCGGAAAGAGCTATAATTTATTCT  
368 CAAAACCGTACTGGGGATACCAAGCAAATCTTGAACGTTTCGTGTTTCAGGATTACACTAATTCGACATCT  
369 AATATTTTGCATTCAACGGCGACGGTTTATTTTATGCTCCGCTATTTCCGCCGGAACATCAGTAAAAT  
370 CTCCGGTAATTTATACTAATACTGTTAATACAGACAGTAAGAATATTGGCGATTATGATATATCTTCATTA  
371 GCAAATAATAATTCTGCCACGGATAAAAACTATTTGCGCGTTGTACGTACCGACCCAGCGTCTGCAATA  
372 CTTTCATGAAATTTGTGAAAATAACGGTATCAGTTGGTATTCTGGTTCAACCCCTACTGATTATATGTTGT  
373 CTTTTGCTTATCCGGTGGTTTTCAAGCAGGTCATTTCGATTGCAGTAGGTATGGAATCAGGGCCTTTGA  
374 CATATTCAACCTTAGGTAAAGGTTCTATTGTTCTTGGTGATAATGATACCGGGTTTAAATGGAAACAAG  
375 ACGGCCTGTTCTATAACAATTAATAATGGAGCTTATACTTTACTTACAACCTCCAACCTGAAGTTACAAGCCT  
376 TAAACAGTTAGTTGCGGGTTATTCAACCAACGGTCTGATTTAATTCTTCTTACAACCTCAAAACTATCCA  
377 TTAGTTATTGTTAATACTACTAATGATAAAAACAGCTTCGGCGACGGTCAAACCTCTTTTAGGTTATCACC  
378 AGAGCGGCAAATATCACCATTATTTTCGTGGCAAAGGTGTAACAAACGTTAACACCGCCGGCGGGTTG  
379 TTGGTTACTCCTGGTAACGTTGAAGTCCGGGGCGGTTCCGGTTAATATTGATGGTCTCAGTAATGCTTCT  
380 ACAGTGCTTTTTAAAGGAAATACTACAGGATATAGTTCAGTCGATAATATAGAGCTCAAAGTTTGGGGT  
381 GACACTTTTAATACGGTAGGTGGTTCTCGTAAAAACGTAATGGAAACATCTGATGCTACTGGCTGGATG  
382 CATTATATTCAACGAACTACAGAAGGTAAGTCAATCCTATTTAAATGGTACCATGAATGTAATTGAAG  
383 GATTGACTGTCAATCAAGATACATCCTTAAAACGTAATCTGTATGTTCCAATGAAATTAAGTTCGCGC  
384 TGCTAGTGGTCTTCGTATTTGGAACGATAAGTATGGTGTATTTTTCGAAATTCGGAAGACCAACTGCAT  
385 ATTATCCGACCAATGCCAATGCCGGCGAAAAGTGGTGGATTGGGCCATTACGACCGTTAAGTATTACA  
386 TTAGACACCGGCATAGTTAAAATTCCTAACTTAGCAGCCAACCAGGTTTCTTTTAGTAGCACAGGTGTA  
387 TTGGAATTCATCGCCGTAACGGTTCATCTTATGCTAACCAGAACACAACCTAAAGCTCCATTGTATCAA  
388 ACGCTTGGTTCTGCGACTCAAGCATTCTATCCTATTACTAAGCAGAAAAATACAGTTTCTAACGTAAC  
389 GTTACTCAAGGTATGGACCGAGCTACGAGCGAATACCGAATTGTTGCTCAAGGTGATTTGCTTGGTGAT  
390 GGTGATGCTACAGGATTGCAATACTGGCGATTTACCAAAGAAGGTAACCTTTATACTCGGAACCGCTTA  
391 TATGCCGGTACAGCTTTCATGAATACCGATGGTAATATTGCAGGTTCTATTTGGAACAAGTATAGCGGTG  
392 CTACTAACCTTGATGCTGCAGTGAATACTCGTGTGGTAAAGGCGGCGATACAATGACTGGCAAATTA  
393 TCGTTAAAAGAGGCTCTGACGCTATTAACATTGCTGCCGATGAAAATGATTCTGCTTATTTACTTGGA  
394 CATCGGGTGGAGCGAATTCGTGGTACATCGGTAAAGGCGGAGCAGATGACTGCTTCATTTTATAATT  
395 TCAAAACTACCGCAGGAATTACTCTTAATAGTGTAGGCGATATTGATTTAATGTTAAAAACAATCTAC  
396 TGCAGCTTCATTAAATTTTATCGTTTATATTTAAACGGAAGACAGTGGACAGCTACTCAAGGCCACGG  
397 ATATAATAATCAATGGCAAACAGAAGCCCCATTCTTCGTTGACTTTGGTGAATCTGTTCCGAAAGATAG  
398 TTATATGCCAATTATCAAAGGAAAAAGCCAAATCATTAAACGAAGGATATGCCACAAAGGCAGATTTTGG  
399 TATTATTAGATTGGGCGGAGATGCTACTTGGGGAATGCAGTAATTCGTGTTGGTTCTGCGGAAAAGTGG  
400 AGATAGCAGTCATCCTAATGCAATATTTGTGTTTCAGGCTAATGGCGATTTTAAAGCTCCGGCTGGTCTT  
401 CGCGCTGGTGTAACTTGGGTGTCGGTACAATTCCAGCATGGGGCGGAGCATCTATCGCCATTGGGGA  
402 CGATGACACCGGCTTGGTCCATGGCGGTGACGGCCGAATTAATATGTATGCCAATAGTATGCATATTGCA  
403 AGCTGGGGA**GCC**GGTTACCATATCCATGAAGGTCTTTGGGATACCACTGGTGCCTTGTGGACTGAAAC  
404 AGGAAGAGCTATTATTTCTTTTGGTCAATTTAGTCCAACAAAACGATAGCTATTCAACATTTGTTCTGTGAC  
405 GTTTATGTTCTGATATTTCGTGTTAAAAAAGACCTTGTTAAATTTGAAAATGCTTCACAGACACTTT  
406 CAAAATTAACGGTTACACTTATATGCAGAAACGTGGCCTGGATGAAGAAGGTAATCAGAAATGGGAA  
407 CCTAATGCCGGTTAATTGCTCAAGAAGTTCAAGCTATTTTACCTGAATTGGTTGAAGGCGACCTGAC  
408 GGTGAAGCTTTACTTCGTTTAAACTATAACGGTGTAAATGGTTTAAATACAGCTGCAATCAATGAGCAC  
409 ACTGCAGAAATAGCAGAATTGAAATCAGAGATTGAAGAACTTAAAGCACTAATTAATCATTGTTAAA  
410 ATAA

411

412 **WQT8**

413 ATGGCTACTTTAAAGCAAATCCAATTTAAAGAAGTAAAGTAGCCGGTGTACGTCCGGCACCCGCCCA  
414 GTTGGCTGAAGGCCAACTGGCTATTAACCTAAAGGACCGTTTACTTTTTACTAAAGACGATACTGGAG  
415 CGATTATCGACCTTGGCTTTGCTAAGGGTGGAAATATCGATGGTAATGTTATTCATAAAGGCAATTACAC  
416 TCAAACCGGTAAATTATAATCTGTCTGGTACTTTTACCCAAACAGGTAGTTATAACGACATCCGGAAGTATA  
417 ACAGCAAATGGTGATATTACTGCAAAATCTCGCCTAATGACGGATATGGGCGAAGTTTTGGTACGTGGC  
418 AATGGTACCCGCACATGTTTCGATTCCAGGATTTAGCTGATGCGCGCGAAAGAGCTATAATTTATTCTCAA  
419 AACCGTACTGGGGATACCAAGCAAATCTGAACGTTTCGTGTTCCAGGATTACACTAATTCGACATCTAAT  
420 ATTTTTGCATTCAACGGCGACGGTTATTTTATGCTCCGTCTATTTCCGCCGGAACATCAGTAAAATCTC  
421 CGGTAATTTATACTAATACTGTTAATACAGACAGTAAGAATATTGGCGATTATGATATATCTTCATTAGCA  
422 AATAATAATTCTGCCACGGATAAAAACCTATTTGCGCGTTGTACGTACCGACCCAGCGTCTGCAATACTT  
423 CATGAAATTTGTGAAAATAACGGTATCAGTTGGTATTCTGGTTCAACCCCTACTGATTATATGTTGTCTT  
424 TTGCTTATCCGGTGGTTTTCAAGCAGGTCATTCGATTGCAGTAGGTATGGAATCAGGGCCTTTGACATA  
425 TTCAACCTTAGGTAAAGTTCTATTGTTCTTGGTGATAATGATACCGGGTTAAATGGAAACAAGACGG  
426 CCTGTTCTATACAATTAATAATGGAGCTTATACTTTACTTACAACCTCAACTGAAGTTACAAGCCTTAAA  
427 CAGTTAGTTGCGGGTTATTCAACCAACGGTCTGATTTAATTCTTCCTACAACCTCAAACTATCCATTAG  
428 TTATTGTTAATACTACTAATGATAAAAACAGCTTCGGCGACGGTCAAACCTTTTTAGGTTATCACCAGA  
429 GCGGCAAATATCACCATTATTTTCGTGGCAAAGGTGTAACAAAACGTTAACACCGCCGGCGGGTTGTTG  
430 GTTACTCCTGGTAACGTTGAAGTCCGGGGCGGTTTCGGTTAATATTGATGGTCTCAGTAATGCTTCTACA  
431 GTGCTTTTTAAAGGAAATACTACAGGATATAGTTTCAGTCGATAATATAGAGCTCAAAGTTTGGGGTGAC  
432 ACTTTTAATACGGTAGGTGGTTCTCGTAAAACGTAATGGAAACATCTGATGCTACTGGCTGGATGCAT  
433 TATATTCAACGAACTACAGAAGGTAAAGTCGAATCCTATTTAAATGGTACCATGAATGTAATTGAAGGA  
434 TTGACTGTCAATCAAGATACATCCTTAAAACGTAATCTGTATGTTTCCAATGAAATTAAGTTCGCGCTG  
435 CTAGTGGTCTTCGTATTTGGAACGATAAGTATGGTGTATTTTTCGAAATTCGGAAGACCAACTGCATAT  
436 TATTCGACCAATGCCAATGCCGGCGAAAGTGGTGGATTGGGCCATTACGACCGTTAAGTATTACATT  
437 AGACACCGGCATAGTTAAAATTCCTAACTTAGCAGCCAACCAGGTTTCTTTTAGTAGCACAGGTGTATT  
438 GGAATTCATCGCCGTAACGGTTCATCTTATGCTAACCAGAACAACAATAAGCTCCATTGTATCAAAC  
439 GCTTGGTTCTGCGACTCAAGCATTCTATCCTATTAAGCAGAAAATACAGTTTCTAACGTAACTGTT  
440 ACTCAAGGTATGGACCGAGCTACGAGCGAATACCGAATTGTTGCTCAAGGTGATTTGCTTGGTGATGG  
441 TGATGCTACAGGATTGCAATACTGGCGATTTACCAAAGAAGGTAACCTTTATAACTCGGAACCGCTTATA  
442 TGCCGGTACAGCTTTCATGAATACCGATGGTAATATTGCAGGTTCTATTTGGAACAAGTATAGCGGTGCT  
443 ACTAACCTTGATGCTGCAGTGAATACTCGTGTGGTAAAGGCGGCGATAAATGACTGGCAAATTAATC  
444 GTTAAAAGAGGCTCTGACGCTATTAACATTGCTGCCGATGAAAATGATTCTGCTTATTTACTTGAACA  
445 TCGGGTGGAGCGAATTCGTGGTACATCGGTAAGGCGGAGCAGATGACACTGCTTCATTTTATAATTC  
446 AAAACTACCGCAGGAATTACTCTTAATAGTGAGGCGATATTGATTTTAAATGTTAAAAACAATCTACTG  
447 CAGCTTCATTAATTTTTATCGTTTATATTTAAACGGAAGACAGTGGACAGCTACTCAAGGCCACGGAT  
448 ATAATAATCAATGGCAAACAGAAGCCCCATTCTTCGTTGACTTTGGTGAATCTGTTCCGAAAGATAGTT  
449 ATATGCCAATTATCAAAGGAAAAAGCCAAATCATTAACGAAGGATATGCCACAAAGGCAGATTTTGGTA  
450 TTATTAGATTGGGCGGAGATGCTACTTGGGGAAATGCAGTAATTCGTGTTGGTTCTGCGGAAAGTGGGA  
451 GATAGCAGTCATCCTAATGCAATAATTTGTGTTTCAGGCTAATGGCGATTTTAAAGCTCCGGCTGGTCTTC  
452 GCGCTGGTGTTAACTTGGGTGTCGTACAATTCAGCATGGGGCGGAGCATCTATCGCCATTGGTGATA  
453 ACGACACAGGTTTAGTCCATGGTGGTGACGGCCGAATTAATATGTATGCCAATAGTATGCATATTGCAA  
454 GCTGGGGAAGCGGTTACCATATCCATGAAGGTCTTTGGGATACCACTGGTGCCTTGTGGACTGAAACA

455 GGAAGAGCTATTATTTCTTTTGGTCATTTAGTCCAACAAAACGATAGCTATTCAACATTTGTTTCGTGACG  
456 TTTATGTTTCGTTCTGATATTCGTGTTAAAAAGACCTTGTTAAATTTGAAAATGCTTCACAGACACTTTC  
457 AAAAATTAACGGTTACACTTATATGCAGAAACGTGGCCTGGATGAAGAAGGTAATCAGAAATGGGAAC  
458 CTAATGCCGGTTAAATTGCTCAAGAAGTTCAAGCTATTTTACCTGAATTGGTTGAAGGGCACCTGACG  
459 GTGAAGCTTTACTTTCGTTTAAACTATAACGGTGTAAATTGGTTTAAATACAGCTGCAATCAATGAGCACA  
460 CTGCAGAAATAGCAGAATTGAAATCAGAGATTGAAGAACTTAAAGCACTAATTAATCATTGTTAAAT  
461 AA

462 **WQT9**

463 ATGGCTACTTTAAAGCAAATCCAATTTAAAGAAGTAAAGTAGCCGGTGTACGTCCGGCACCGGCCA  
464 GTTGGCTGAAGGCGAACTGGCTATTAACCTAAAGGACCGTTTACTTTTACTAAAGACGATACTGGAG  
465 CGATTATCGACCTTGGCTTTGCTAAGGGTGGAAATATCGACGGAAACGTTATTCATAACGGTAACTACA  
466 CTCAAACCGGTAATTATAATCTGTCTGGTACTTTTACCCAAACAGGTAGTTATACGACATCCGGAAGTAT  
467 AACAGCAAATGGTGATTAATGCAAAAATCTCGCCTAATGACGGATATGGGCGAAGTTTGGTACGTGG  
468 CAATGGTACCGCACATGTTTCGATTCCAGGATTTAGCTGATGCGCGGAAAGAGCTATAATTTATTCTCA  
469 AAACCGTACTGGGGATACCAAGCAAATCTTGAACGTTTCGTGTTTCAGGATTACACTAATTCGACATCTAA  
470 TATTTTTGCATTCAACGGCGACGGTTTATTTATGCTCCGCTATTTCCGCCGGAACATCAGTAAAATCT  
471 CCGGTAATTTATACTAATACTGTTAATACAGACAGTAAGAATATTGGCGATTATGATATATCTTCATTAGC  
472 AAATAATAATTCTGCCACGGATAAAAATATTGCGCGTTGTACGTACCGACCCAGCGTCTGCAATACT  
473 TCATGAAATTTGTGAAAATAACGGTATCAGTTGGTATTCTGGTTCAACCCCTACTGATTATATGTTGTCT  
474 TTTGCTTATCCGGTGGTTTTCAAGCAGGTCATTTCGATTGCAGTAGGTATGGAATCAGGGCCTTTGACAT  
475 ATCAACCTTAGGTAAAGGTTCTATTGTTCTTGGTGATAATGATACCGGGTTAAATGGAAACAAGACG  
476 GCCTGTTCTATAACAATTAATAATGGAGCTTATACTTTACTTACAACCTCAACTGAAGTTACAAGCCTTAA  
477 ACAGTTAGTTGCGGGTATTCAACCAACGGTTCTGATTAAATTCTTCCTACAACCTCAAACTATCCATTA  
478 GTTATTGTTAATACTACTAATGATAAAAACAGCTTCGGCGACGGTCAAACCTTTTTAGGTTATCACCAG  
479 AGCGGCAAATATCACCATTATTTTCGTGGCAAAGGTGTAACAAACGTTAACACCGCCGGCGGGTTGTT  
480 GGTTACTCTGTTAACGTTGAAGTCCGGGGCGGTTTCGGTTAATATTGATGGTCTCAGTAATGCTTCTAC  
481 AGTGCTTTTTAAAGGAAATACTACAGGATATAGTTCAGTCGATAATATAGAGCTCAAAGTTTGGGGTGA  
482 CACTTTTAATACGGTAGGTGGTTCTCGTAAAAACGTAATGGAAACATCTGATGCTACTGGCTGGATGCA  
483 TTATATCAACGAACACAGAAGGTAAAGTCAATCTTAAATGGTACCATGAATGTAATTGAAGG  
484 ATTGACTGTCAATCAAGATACATCCTTAAACGTAATCTGTATGTTTCCAATGAAATTAAGTTCGCGCT  
485 GCTAGTGGTCTTCGTATTTGGAACGATAAGTATGGTGTATTTTTCGAAATTCGGAAGACCAACTGCATA  
486 TTATCCGACCAATGCCAATGCCGGCGAAAGTGGTGGATTGGGCCATTACGACCGTTAAGTATTACAT  
487 TAGACACCGGCATAGTTAAATTCCTAACTTAGCAGCCAACCAGGTTTCTTTTAGTAGCACAGGTGTAT  
488 TGGAATTCATCGCCGGTAACGGTTCATCTTATGCTAACCAGAACAACAATAAGCTCCATTGTATCAAA  
489 CGCTTGGTTCTGCGACTCAAGCATTCTATCTTACTAAGCAGAAAATACAGTTTCTAACGTAACCTG  
490 TTAICTAAGGTATGGACCGAGCTACGAGCGAATACCGAATTGTTGCTCAAGGTGATTTGCTTGGTGATG  
491 GTGATGCTACAGGATTGCAATACTGGCGATTTACCAAAGAAGGTAACCTTATAACTCGGAACCGCTTAT  
492 ATGCCGGTACAGCTTTCATGAATACCGATGGTAATATTGCAGGTTCTATTTGGAACAAGTATAGCGGTGC  
493 TACTAACCTTGATGCTGCAGTGAATACTCGTGTGGTAAAGGCGGCGATAACAATGACTGGCAAATTAAT  
494 CGTTAAAAGAGGCTCTGACGCTATTAACATTGCTGCCGATGAAAATGATTCTGCTTATTTACTTGGAAC  
495 ATCGGGTGGAGCGAATTCGTGGTACATCGGTAAAGGCGGAGCAGATGACACTGCTTCATTTATAATTT  
496 CAAAACCTACCGCAGGAATTACTCTTAATAGTGTAGGCGATATTGATTTAATGTTAAAAACAATCTACT  
497 GCAGCTTCATTAATTTTTATCGTTTATTTAAACGGAAGACAGTGGACAGCTACTCAAGGCCACGGA  
498 TATAATAATCAATGGCAAACAGAAGCCCCATTCTTCGTTGACTTTGGTGAATCTGTTCCGAAAGATAGT

499 TATATGCCAATTATCAAAGGAAAAAGCCAAATCATTAACGAAGGATATGCCACAAAGGCAGATTTTGGT  
500 ATTATTAGATTGGGCGGAGATGCTACTTGGGGAAATGCAGTAATTCGTGTTGGTTCTGCGGAAAGTGGA  
501 GATAGCAGTCATCCTAATGCAATATTTGTGTTTCAGGCTAATGGCGATTTAAAGCTCCGGCTGGTCTTC  
502 GCGCTGGTGTTAACTTGGGTGTCGGTACAATTCAGCATGGGGCGGAGCATCTATCGCCATTGGGGAC  
503 GATGACACCGGCTTGGTCCATGGCGGTGACGGCCGAATTAATATGTATGCCAATAGTATGCATATTGCA  
504 AGCTGGGGAGCTGGTTACCATATCCATGAAGGTCTTTGGGATACCACTGGTGCCTTGTGGACTGAAAC  
505 AGGAAGAGCTATTATTTCTTTTGGTCATTTAGTCCAACAAAACGATAGCTATTCAACATTTGTTTCGTGAC  
506 GTTTATGTTTCGTTCTGATATTCGTGTTAAAAAAGACCTTGTTAAATTTGAAAATGCTTCACAGACACTTT  
507 CAAAAATTAACGGTTACACTTATATGCAGAAACGTGGCCTGGATGAAGAAGGTAATCAGAAATGGGAA  
508 CCTAATGCCGGTTAATTGCTCAAGAAGTTCAAGCTATTTTACCTGAATTGGTTGAAGGCGACCTGAC  
509 GGTGAAGCTTTACTTCGTTTAAACTATAACGGTGTAATTGGTTTAAATACAGCTGCAATCAATGAGCAC  
510 ACTGCAGAAATAGCAGAATTGAAATCAGAGATTGAAGAACTTAAAGCACTAATTAATCATTGTAAA  
511 ATAA  
512 **WQT10**  
513 ATGGCTACTTTAAAGCAAATCCAATTTAAAGAAGTAAAGTAGCCGGTGTACGTCCGGCACCGGCCCA  
514 GTTGGCTGAAGGCGAACTGGCTATTAACCTAAAGGACCGTTTACTTTTTACTAAAGACGATACTGGAG  
515 CGATTATCGACCTTGGCTTTGCTAAGGGTGGAAATATCGATGGTAATGTTATTCATAACGGTAACTACAC  
516 TCAAACCGGTAATTATAATCTGTCTGGTACTTTTACCCAAACAGGTAGTTATACGACATCCGGAAGTATA  
517 ACAGCAAATGGTGATATTACTGCAAAATCTCGCCTAATGACGGATATGGGCGAAGTTTTGGTACGTGGC  
518 AATGGTACCGCACATGTTTCGATTCCAGGATTTAGCTGATGCGCGCGAAAGAGCTATAATTTATTCTCAA  
519 AACCGTACTGGGGATACCAAGCAAATCTGAACGTTTCGTGTTTCAGGATTACACTAATTCGACATCTAAT  
520 ATTTTTGCATTCAACGGCGACGGTTTATTTTATGCTCCGTCTATTTCCGCCGGAACATCAGTAAAATCTC  
521 CGGTAATTTATACTAATACTGTTAATACAGACAGTAAGAATATTGGCGATTATGATATATCTTCATTAGCA  
522 AATAATAATTTGCCACGGATAAAAACTATTTGCGCGTTGTACGTACCGACCCAGCGTCTGCAATACTT  
523 CATGAAATTTGTGAAAATAACGGTATCAGTTGGTATTCTGGTTCAACCCCTACTGATTATATGTTGTCTT  
524 TTGCTTATCCGGTGGTTTTCAAGCAGGTCATTCGATTGCAGTAGGTATGGAATCAGGGCCTTTGACATA  
525 TTCAACCTTAGGTAAAGTTCTATTGTTCTTGGTGATAATGATACCGGGTTTAAATGAAACAAGACGG  
526 CCTGTTCTATACAATTAATAATGGAGCTTATACTTTACTTACAACCTCAACTGAAGTTACAAGCCTTAAA  
527 CAGTTAGTTGCGGGTTATTCAACCAACGGTCTGATTTAATTCTTCTACAACCTCAAACTATCCATTAG  
528 TTATTGTTAATACTACTAATGATAAAAACAGCTTCGGCGACGGTCAAACCTTTTTAGGTTATCACCAGA  
529 GCGGCAAATATCACCATTATTTTCGTGGCAAAGGTGTAACAAACGTTAACACCGCCGGCGGGTGTG  
530 GTTACTCCTGGTAACGTTGAAGTCCGGGGCGGTTTCGGTTAATATTGATGGTCTCAGTAATGCTTCTACA  
531 GTGCTTTTTAAAGGAAATACTACAGGATATAGTTTCAGTCGATAATATAGAGCTCAAAGTTTGGGGTGAC  
532 ACTTTTAATACGGTAGGTGGTTCTCGTAAAAACGTAATGAAAACATCTGATGCTACTGGCTGGATGCAT  
533 TATATCAACGAACTACAGAAGGTAAAAGTCGAATCCTATTTAAATGGTACCATGAATGTAATTGAAGGA  
534 TTGACTGTCAATCAAGATACATCCTTAAAACGTAATCTGTATGTTTCCAATGAAATTAAGTTTCGCGCTG  
535 CTAGTGGTCTTCGTATTTGGAACGATAAGTATGGTGTATTTTTCGAAATTCGGAAGACCAACTGCATAT  
536 TATTCGACCAATGCCAATGCCGGCGAAAGTGGTGGATTGGGCCATTACGACCGTTAAGTATTACATT  
537 AGACACCGGCATAGTTAAAATTCCTAACTTAGCAGCCAACCAGGTTTCTTTTAGTAGCACAGGTGTATT  
538 GGAATTCATCGCCGGTAACGGTTCATCTTATGCTAACCAGAACACAACCTAAAGCTCCATTGTATCAAAC  
539 GCTTGGTTCTGCGACTCAAGCATTCTATCCTATTAAGCAGAAAAATACAGTTTCTAACGTAACCTGTT  
540 ACTCAAGGTATGGACCGAGCTACGAGCGAATACCGAATTGTTGCTCAAGGTGATTTGCTTGGTGATGG  
541 TGATGCTACAGGATTGCAATACTGGCGATTTACCAAAGAAAGGTAACCTTTATAACTCGGAACCGCTTATA  
542 TGCCGGTACAGCTTTCATGAATACCGATGGTAATATTGCAGGTTCTATTTGGAACAAGTATAGCGGTGCT

543 ACTAACCTTGATGCTGCAGTGAATACTCGTGTTGGTAAAGGCGGCGATAACAATGACTGGCAAATTAATC  
544 GTTAAAAGAGGCTCTGACGCTATTAACATTGCTGCCGATGAAAATGATTCTGCTTATTTACTTGGAAACA  
545 TCGGGTGGAGCGAATTCGTGGTACATCGGTAAAGGCGGAGCAGATGACACTGCTTCATTTTATAATTC  
546 AAAACTACCGCAGGAATTACTCTTAATAGTGTAGGCGATATTGATTTTAAATGTTAAAAACAATCTACTG  
547 CAGCTTCATTAATTTTTATCGTTTATATTTAAACGGAAGACAGTGGACAGCTACTCAAGGCCACGGAT  
548 ATAATAATCAATGGCAAACAGAAGCCCCATTCTTCGTTGACTTTGGTGAATCTGTTCCGAAAGATAGTT  
549 ATATGCCAATTATCAAAGGAAAAAGCCAAATCATTAACGAAGGATATGCCACAAAGGCAGATTTTGGTA  
550 TTATTAGATTGGGCGGAGATGCTACTTGGGGAAATGCAGTAATTCGTGTTGGTTCTGCGGAAAGTGGA  
551 GATAGCAGTCATCCTAATGCAATATTTGTGTTTCAGGCTAATGGCGATTTTAAAGCTCCGGCTGGTCTTC  
552 GCGCTGGTGTAACTTGGGTGTCGGTACAATCCAGCATGGGGCGGAGCATCTATCGCCATTGGGGAC  
553 GATGACACCGGCTTGGTCCATGGCGGTGACGGCCGAATTAATATGTATGCCAATAGTATGCATATTGCA  
554 AGCTGGGGAGCTGGTTACCATATCCATGAAGGTCTTTGGGATACCACTGGTGCCTTGTGGACTGAAAC  
555 AGGAAGAGCTATATTTCTTTTGGTCATTTAGTCCAACAAAACGATAGCTATCAACATTTGTTCTGTGAC  
556 GTTTATGTTCTGTTCTGATATTCGTGTTAAAAAAGACCTTGTTAAATTTGAAAATGCTTCACAGACACTTT  
557 CAAAAATTAACGGTTACACTTATATGCAGAAACGTGGCCTGGATGAAGAAGGTAATCAGAAATGGGAA  
558 CCTAATGCCGGTTAATTGCTCAAGAAGTTCAAGCTATTTTACCTGAATTGGTTGAAGGCGACCCTGAC  
559 GGTGAAGCTTACTTCGTTTAAACTATAACGGTGAATTTGGTTTAAATACAGCTGCAATCAATGAGCAC  
560 ACTGCAGAAATAGCAGAATTGAAATCAGAGATTGAAGAACTTAAAGCACTAATTAATCATTGTAAA  
561 ATAA

562

563 **WQT11**

564 ATGGCTACTTTAAAGCAAATCCAATTTAAAGAAGTAAAGTAGCCGGTGTACGTCCGGCACCGGCCCA  
565 GTTGGCTGAAGGCGAACTGGCTATTAACCTTAAAGGACCGTTTACTTTTACTAAAGACGATACTGGAG  
566 CGATTATCGACCTTGGCTTTGCTAAGGGTGGAAATATCGATGGTAATGTTATTCATAACGGTAACTACAC  
567 TCAAACCGGTAATTATAATCTGTCTGGTACTTTTACCCAAACAGGTAGTTATACGACATCCGGAAGTATA  
568 ACAGCAAATGGTGATTAATCTGCAAAATCTCGCCTAATGACGGATATGGGCGAAGTTTTGGTACGTGGC  
569 AATGGTACCGCACATGTTTCGATTCCAGGATTTAGCTGATGCGCGCGAAAGAGCTATAATTTATTCTCAA  
570 AACCGTACTGGGGATACCAAGCAAATCTTGAACGTTCTGTGTTTCAAGGATTACACTAATTCGACATCTAAT  
571 ATTTTTGCATTCAACGGCGACGGTTATTTTATGCTCCGTCTATTTCCGCCGGAACATCAGTAAAATCTC  
572 CGGTAATTTATACTAATACTGTTAATACAGACAGTAAGAATATTGGCGATTATGATATACTTCATTAGCA  
573 AATAATAATTCTGCCACGGATAAAAACCTATTTGCGCGTTGTACGTACCGACCCAGCGTCTGCAATACTT  
574 CATGAAATTTGTGAAAATAACGGTATCAGTTGGTATTCTGGTTCAACCCCTACTGATTATATGTTGTCTT  
575 TTGCTTATCCGGTGGTTTTCAAGCAGGTCATTCGATTGCAGTAGGTATGGAATCAGGGCCTTTGACATA  
576 TTCAACCTTAGGTAAAGTTCTATTGTTCTTGGTGATAATGATACCGGGTTTAAATGGAAACAAGACGG  
577 CCTGTTCTATACAATTAATAATGGAGCTTATACTTTACTTACAACCTCAACTGAAGTTACAAGCCTTAAA  
578 CAGTTAGTTGCGGGTTATTCAACCAACGGTTCTGATTTAATTCTTCTACAACCTCAAACTATCCATTAG  
579 TTATTGTTAATACTACTAATGATAAAAACAGCTTCGGCGACGGTCAAACCTTTTTAGGTTATCACCAGA  
580 GCGGCAAATATCACCATTATTTTCGTGGCAAAGGTGTAACAAACGTTAACACCGCCGGCGGGTTGTTG  
581 GTTACTCCTGGTAACGTTGAAGTCCGGGGCGGTTCCGGTTAATATTGATGGTCTCAGTAATGCTTCTACA  
582 GTGCTTTTTAAAGGAAATACTACAGGATATAGTTTCAAGTGCATAATATAGAGCTCAAAGTTTGGGGTGAC  
583 ACTTTTAAATACGGTAGGTGGTTCTCGTAAAACGTAATGGAAACATCTGATGCTACTGGCTGGATGCAT  
584 TATATTCAACGAACTACAGAAGGTAAAGTCAATCCTATTTAAATGGTACCATGAATGTAATTGAAGGA  
585 TTGACTGTCAATCAAGATACATCCTTAAAACGTAATCTGTATGTTTCCAATGAAATTAAGTTCCGCGCTG  
586 CTAGTGGTCTTCGTATTTGGAACGATAAGTATGGTGTATTTTTCGAAATTCGGAAGACCAACTGCATAT

587 TATTCGACCAATGCCAATGCCGGCGAAAAGTGGTGGATTGGGCCATTACGACCGTTAAGTATTACATT  
588 AGACACCGGCATAGTTAAAATTCCTAACTTAGCAGCCAACCAGGTTTCTTTTAGTAGCACAGGTGTATT  
589 GGAATTCATCGCCGTAACGGTTCATCTTATGCTAACCAGAACACAACCTAAAGCTCCATTGTATCAAAC  
590 GCTTGGTTCTGCGACTCAAGCATTCTATCCTATTACTAAGCAGAAAAATACAGTTTCTAACGTAACGTGT  
591 ACTCAAGGTATGGACCGAGCTACGAGCGAATACCGAATTGTTGCTCAAGGTGATTTGCTTGGTGATGG  
592 TGATGCTACAGGATTGCAATACTGGCGATTTACCAAAGAAGGTAACCTTATAACTCGGAACCGCTTATA  
593 TGCCGGTACAGCTTTCATGAATACCGATGGTAATATTGCAGGTTCTATTTGGAACAAGTATAGCGGTGCT  
594 ACTAACCTTGATGCTGCAGTGAATACTCGTGTTGGTAAAGCGGCGATACAATGACTGGCAAATTAATC  
595 GTTAAAAGAGGCTCTGACGCTATTAACATTGCTGCCGATGAAAATGATTCTGCTTATTTACTTGGAAACA  
596 TCGGGTGGAGCGAATTCGTGGTACATCGGTAAAGGCGGAGCAGATGACACTGCTTCATTTATAATTC  
597 AAAACTACCGCAGGAATTACTCTTAATAGTGTAGGCGATATTGATTTTAATGTTAAAAACAATCTACTG  
598 CAGCTTCATTAATTTTTATCGTTTATATTTAAACGGAAGACAGTGGACAGCTACTCAAGGCCACGGAT  
599 ATAATAATCAATGGCAAACAGAAAGCCCATCTTCGTTGACTTTGGTGAATCTGTTCCGAAAGATAGTT  
600 ATATGCCAATTATCAAAGGAAAAAGCCAAATCATTAACGAAGGATATGCCACAAAGGCAGATTTTGGTA  
601 TTATTAGATTGGGCGGAGATGCTACTTGGGGAAATGCAGTAATTCGTGTTGGTTCTGCGGAAAGTGGA  
602 GATAGCAGTCATCCTAATGCAATATTTGTGTTTCAGGCTAATGGCGATTTTAAAGCTCCGGCTGGTCTTC  
603 GCGCTGGTGTTAACTTGGGTGTCGGTACAATCCAGCATGGGGCGGAGCATCTATCGCCATTGGTGATA  
604 ACGACACAGGTTTAGTCCATGGTGGTGACGGCCGAATTAATATGTATGCCAATAGTATGCATATTGCAA  
605 GCTGGGGA GCCGGTTACCATATCCATGAAGGTCTTTGGGATACCACTGGTGCCTTGTGGACTGAAACA  
606 GGAAGAGCTATTATTTCTTTTGGTCATTTAGTCCAACAAAACGATAGCTATTCAACATTTGTTCGTGACG  
607 TTTATGTTCTGTTCTGATATTCGTGTTAAAAAAGACCTTGTTAAATTTGAAAATGCTTCACAGACACTTTC  
608 AAAAATTAACGGTTACACTTATATGCAGAAACGTGGCCTGGATGAAGAAGGTAATCAGAAATGGGAAC  
609 CTAATGCCGGTTTAAATGCTCAAGAAGTTCAAGCTATTTTACCTGAATTGGTTGAAGGCGACCCCTGACG  
610 GTGAAGCTTTACTTTCGTTTAAACTATAACGGTGTAAATGGTTTAAATACAGCTGCAATCAATGAGCACA  
611 CTGCAGAAATAGCAGAATTGAAATCAGAGATTGAAGA ACTTAAAGCACTAATTAATCATTGTTAAAT  
612 AA

613

614 **WQT12**

615 ATGGCTACTTTAAAGCAAATCCAATTTAAAAGAAGTAAAGTAGCCGGTGTACGTCCGGCACCGGCCA  
616 GTTGGCTGAAGGCGAACTGGCTATTACTTAAAGGACCGTTTACTTTTACTAAAGACGATACTGGAG  
617 CGATTATCGACCTTGGCTTTGCTAAGGGTGGAAATATCGATGGTAATGTTATTCAAAAAGGCAATTACAA  
618 CCAAACCGGCATTATAATCTGTCTGGTACTTTTACCCAAACAGGTAGTTATACGACATCCGGAAGTAT  
619 AACAGCAAATGGTGATATTACTGCAAAAATCTCGCCTAATGACGGATATGGGCGAAGTTTGGTACGTGG  
620 CAATGGTACCGCACATGTTTCGATTCCAGGATTTAGCTGATGCGCGGAAAGAGCTATAATTTATTCTCA  
621 AAACCGTACTGGGGATACCAAGCAAATCTTGAACGTTTCGTGTTTACAGGATTACACTAATTCGACATCTAA  
622 TATTTTTGCATTCAACGGCGACGGTTTATTTTATGCTCCGCTATTTCCGCCGGAACATCAGTAAAATCT  
623 CCGGTAATTTATACTAATACTGTTAATACAGACAGTAAGAATATTGGCGATTATGATATATCTTCATTAGC  
624 AAATAATAATTCTGCCACGGATAAAAACTATTTGCGCGTTGTACGTACCGACCCAGCGTCTGCAATACT  
625 TCATGAAATTTGTGAAAATAACGGTATCAGTTGGTATTCTGGTTCAACCCCTACTGATTATATGTTGTCT  
626 TTTGCTTATCCGGTGGTTTTCAAGCAGGTCATTGATTGCAGTAGGTATGGAATCAGGGCCTTTGACAT  
627 ATTC AACCTTAGGTAAAGGTTCTATTGTTCTTGGTGATAATGATACCGGGTTTAAATGGAACAAGACG  
628 GCCTGTTCTATACAATTAATAATGGAGCTTATACTTTACTTACA ACTCCA ACTGAAGTTACAAGCCTTAA  
629 ACAGTTAGTTGCGGGTATTCAACCAACGGTTCTGATTTAATTTCTTCTACA ACTCAA AACTATCCATTA  
630 GTTATTGTTAATACTACTAATGATAAAAAACAGCTTCGGCGACGGTCAA ACTCTTTTAGGTTATCACCAG

631 AGCGGCAAATATCACCATTATTTTCGTGGCAAAGGTGTAACAAACGTTAACACCGCCGGCGGGTTGTT  
632 GGTTACTCCTGGTAACGTTGAAGTCCGGGGCGGTTCCGGTTAATATTGATGGTCTCAGTAATGCTTCTAC  
633 AGTGCTTTTTAAAGGAAATACTACAGGATATAGTTCAGTCGATAATATAGAGCTCAAAGTTGGGGTGA  
634 CACTTTTAATACGGTAGGTGGTTCTCGTAAAAACGTAATGGAAACATCTGATGCTACTGGCTGGATGCA  
635 TTATATTCAACGAACACTACAGAAGGTAAAGTCGAATCCTATTTAAATGGTACCATGAATGTAATTGAAGG  
636 ATTGACTGTCAATCAAGATACATCCTTAAAACGTAATCTGTATGTTTCCAATGAAATTAAGTTTCGCGCT  
637 GCTAGTGGTCTTCGTATTTGGAACGATAAGTATGGTGTATTTTTCGAAATTCGGAAGACCAACTGCATA  
638 TTATCCGACCAATGCCAATGCCGGCGAAAGTGGTGGATTGGGCCATTACGACCGTTAAGTATTACAT  
639 TAGACACCGGCATAGTTAAAATTCCTAACTTAGCAGCCAACCAGGTTTCTTTTAGTAGCACAGGTGTAT  
640 TGGAATTCATCGCCGGTAACGGTTCATCTTATGCTAACCCAGAACACAACCTAAAGCTCCATTGTATCAA  
641 CGCTTGGTTCTGCGACTCAAGCATTCTATCTTACTAAGCAGAAAAATACAGTTTCTAACGTAACCTG  
642 TTAICTCAAGGTATGGACCGAGCTACGAGCGAATACCGAATTGTTGCTCAAGGTGATTTGCTTGGTGATG  
643 GTGATGCTACAGGATTGCAATACTGGCGATTTACCAAAGAAGGTAACCTTATAACTCGGAACCGCTTAT  
644 ATGCCGGTACAGCTTTCATGAATACCGATGGTAATATTGCAGGTTCTATTTGGAACAAGTATAGCGGTGC  
645 TACTAACCTTGATGCTGCAGTGAATACTCGTGTGGTAAAGGCGGCGATACAATGACTGGCAAATTAAT  
646 CGTTAAAAGAGGCTCTGACGCTATTAACATTGCTGCCGATGAAAATGATTCTGCTTATTTACTTGGAAC  
647 ATCGGGTGGAGCGAATTCGTGGTACATCGGTAAAGGCGGAGCAGATGACTGCTTCATTTATAATTT  
648 CAAAACCTACCGCAGGAATTACTCTTAATAGTGTAGGCGATATTGATTTTAATGTAAAAACAATCTACT  
649 GCAGCTTCATTAATTTTTATCGTTTATAATTTAAACGGAAGACAGTGGACAGCTACTCAAGGCCACGGA  
650 TATAATAATCAATGGCAAACAGAAGCCCCATTCTTCGTTGACTTTGGTGAATCTGTTCCGAAAGATAGT  
651 TATATGCCAATTATCAAAGGAAAAAGCCAAATCATTAACGAAGGATATGCCACAAAGGCAGATTTTGGT  
652 ATTATTAGATTGGGCGGAGATGCTACTTGGGGAAATGCAGTAATTCGTGTTGGTTCTGCGGAAAGTGGA  
653 GATAGCAGTCATCCTAATGCAATATTTGTGTTTCAGGCTAATGGCGATTTAAAGCTCCGGCTGGTCTTC  
654 GCGCTGGTGTTAACTTGGGTGTCGGTACAATTCAGCATGGGGCGGAGCATCTATCGCCATTGGGGAC  
655 GATGACACCGGCTTGGTCCATGGCGGTGACGGCCGAATTAATATGTATGCCAATAGTATGCATATTGCA  
656 AGCTGGGGAGCTGGTTACCATATCCATGAAGGTCTTTGGGATACCACTGGTGCCTTGTGGACTGAAAC  
657 AGGAAGAGCTATTATTTCTTTTGGTCATTTAGTCCAACAAAACGATAGCTATTCAACATTTGTTCTGTAC  
658 GTTTATGTTCTGTTCTGATATTCTGTGTTAAAAAAGACCTTGTTAAATTTGAAAATGCTTCACAGACTTT  
659 CAAAAATTAACGGTTACTTATATGCAGAAACGTGGCCTGGATGAAGAAGGTAATCAGAAATGGGAA  
660 CCTAATGCCGGTTTAAATTGCTCAAGAAGTTCAAGCTATTTTACCTGAATTGGTTGAAGGCGACCCTGAC  
661 GGTGAAGCTTTACTTCGTTTAAACTATAACGGTGTAAATTGGTTTAAATACAGCTGCAATCAATGAGCAC  
662 ACTGCAGAAATAGCAGAATTGAAATCAGAGATTGAAGAACTTAAAGCACTAATTAATCATTGTTAAA  
663 ATAA

664

665 **WQC1**

666 ATGGCTACTTTAAAGCAAATCCAATTTAAAAGAAGTAAAGTAGCCGGTGTACGTCCGGCACCGGCCA  
667 GTTGGCTGAAGGCGAACTGGCTATTAACCTTAAAGGACCGTTTACTTTTTACTAAAGACGATACTGGAG  
668 CGATTATCGACCTTGGCTTTGCTAAGGGTGGAAATATCGATGGTAATGTTATTCATAAAGGCAATTACAA  
669 CCAAACCGGCGATTATACACTTAATGGTGTATTTACTCAAATGGTGATTTCAATCTCAATGGTATTGCT  
670 CGTGTAACCTCGTGACATTATTGCCGCTGGCCAGATAATGACCGAAGGCGGCGAGCTTATTTCTAAGAGC  
671 GCCTCAACTTCTCACCTTCGTTTCTTTGATGGTGTATCGTGAACGTGGTATTATCTTTTCTCAAATA  
672 ATGCGGGTCTTACCAATCAAGTAGTTAATATTCGCGTCCAAGATTACGCTGCAGGAAGTGAAAGCACCT  
673 ACGCGTTTTACAGGCAATGGTGTATTTTCTTACCAGAAGTTTTTGGGTGGAAATCTGTATCAACTCCGG  
674 TAATTTATACCAATAAAGTTATTACTAATAAAAAGGTTAAAGGTGATTATGACATCTATTCGTTGGCTGA



675 CAACACTCCATTTGAAGAAGGCGAAACGGCTATTAACCACCTCCGTGTTATGCGAAATGCTGTAGGAG  
676 CAGGTATTTCCACGAAGTTAATGTTAATGACGGAATAACCTGGTATTCCGGAGATGGCTTAGACTT  
677 ATCTTTGGTCGTTTAACTGGGCCGGTGGATTGAAAACCGGTCATTCTATTTCTGTAGGTCTTCCAGGTG  
678 GTTCTAAAGGATATTCTGAATTAGGAACTGCATCAATTGCTCTTGGTGATAATGACACCGGGTTAAAAT  
679 GGCACCAAGATGGTTATTTCTTTAGTGTAACAACGGCACAAGAAGTTTCCCTGAGCGGCCCTGCAGAA  
680 ACCACCAGTCTTAGAAAAATGGTTATGGGTTATTCTGTAAACGGTACCGATTAAACACTCCTCCGTCG  
681 GAAAACATATGCTTTGGCGACGGTTGTCACCTATCATGATAATAACGCGTATGGCGACGGTCAAACCTT  
682 TTAGGTTATTATCAAGGTGGCAATTATCACCCTATTTCCTGGTAAAGGTAACAAACGTTAACACC  
683 GCTGGTGGTTTGTAGTTACTCCGGGTAATATTGATGTTGTTGGCGGTTCCGGTTAATATTGATGGCCGCA  
684 ACAATGCTTCTACTAATGTTTCAGAGGAAATACTACAGGAAGTAGTTCAGTTGATAATATGACTATCG  
685 CCGTTTGGGGTAATACCTTTACTAATGTTGATGGTGACCGTAAAAACGTAATGGAAACATCTGATGCTA  
686 CTGGCTGGATGCATTATATTCAACGAACTACAGAAGGTAAAGTCGAATCCTATTTAAATGGTACCATGA  
687 ATGTAATTGAAGGATTGACTGTCAATCAAGATACATCCTAAAACGTAATCTGTATGTTTCCAATGAAAT  
688 TAAAGTTCGCGCTGCTAGTGGTCTTCGTATTTGGAACGATAAGTATGGTGTATTTTTCGAAATTCGGAA  
689 GACCAACTGCATATTATCCGACCAATGCCAATGCCGCGGAAAGTGGTGGATTGGGCCATTACGACC  
690 GTTAAAGTATTACATTAGACACCGGCATAGTAAAATTCCTAACTTAGCAGCCAACCAGGTTTCTTTTAGT  
691 AGCACAGGTGTATTGGAATTCATCGCCGTAACGGTTCATCTTATGCTAACCAGAACACAACCTAAAGCT  
692 CCATTGTATCAAACGCTTGGTTCTGCGACTCAAGCATTCTATCCTATTACTAAGCAGAAAAATACAGTTT  
693 CTAACGTAACCTGTTACTCAAGGTATGGACCGAGCTACGAGCGAATACCGAATTGTTGCTCAAGGTGATT  
694 TGCTTGGTGATGGTGATGCTACAGGATTGCAATACTGGCGATTTACCAAAGAAGGTAACCTTATAACTC  
695 GGAACCGCTTATATGCCGGTACAGCTTTCATGAATACCGATGGTAATATTGCAGGTTCTATTTGGAACAA  
696 GTATAGCGGTGCTACTAACCTTGATGCTGCAGTGAATACTCGTGTGGTAAAGGCGCGATACAATGAC  
697 TGGCAAATTAATCGTTAAAAGAGGCTCTGACGCTATTAACATTGCTGCCGATGAAAATGATTCTGCTTA  
698 TTTACTTGAACATCGGGTGGAGCGAATTCGTGGTACATCGGTAAAGGCGGAGCAGATGACTGCTT  
699 CATTTTATAATTTCAAAACTACCGCAGGAATTACTCTTAATAGTGTAGGCGATATTGATTTAATGTTAAA  
700 AAACAATCTACTGCAGCTTCATTAATTTTTATCGTTTATTTAAACGGAAGACAGTGGACAGCTACTC  
701 AAGGCCACGGATATAATAATCAATGGCAAACAGAAGCCCCATTCTTCGTTGACTTTGGTGAATCTGTTC  
702 CGAAAGATAGTTATATGCCAATTATCAAAGGAAAAAGCCAAATCATTAAACGAAGGATATGCCACAAAG  
703 GCAGATTTTGGTATTATTAGATTGGGCGGAGATGCTACTTGGGGAAATGCAGTAATTCGTGTTGGTTCT  
704 GCGGAAAGTGGAGATAGCAGTCATCCTAATGCAATATTTGTGTTTCAGGCTAATGGCGATTTTAAAGCT  
705 CCGGCTGGTCTTCGCGCTGGTGTAACTTGGGTGTCGGTACAATTCCAGCATGGGGCGGAGCATCTATC  
706 GCCATTGGGGACGATGACACCGGCTTGGTCCATGGCGGTGACGGCCGAATTAATATGTATGCCAATAGT  
707 ATGCATATTGCAAGCTGGGGAGCTGGTTACCATATCCATGAAGGTCTTTGGGATACCACTGGTGCCTTG  
708 TGGACTGAAACAGGAAGAGCTATTATTTCTTTTGGTCAATTTAGTCCAACAAAACGATAGCTATTCAACA  
709 TTTGTTCTGTGACGTTTATGTTCTGTTCTGATATTCTGTGTTAAAAAAGACCTTGTTAAATTTGAAAATGCTT  
710 CACAGACACTTTCAAAAATTAACGGTTACACTTATATGCAGAAAACGTGGCCTGGATGAAGAAGGTAAT  
711 CAGAAATGGGAACCTAATGCCGGTTAATGCTCAAGAAGTTCAGCTATTTTACCTGAATTGGTTGAA  
712 GGGCACCCTGACGGTGAAGCTTTACTTCGTTTAAACTATAACGGTGTAAATTGGTTTAAATACAGCTGCA  
713 ATCAATGAGCACACTGCAGAAATAGCAGAATTGAAATCAGAGATTGAAGAAGCTTAAAGCACTAATTA  
714 ATCATTGTAAAATAA

715

716 **WQD1**

717 ATGGCTACTTTAAAGCAAATCCAATTTAAAGAAAGTAAAGTAGCCGGTGTACGTCCGGCACCGGCCCA  
718 GTTGGCTGAAGGCGAACTGGCTATTAACCTTAAAGGACCGTTTACTTTTTACTAAAGACGATACTGGAG

719 CGATTATCGACCTTGGCTTTGCTAAGGGTGGAAATATCGATGGTAATGTTATTCATAAAGGCAATTACAA  
720 CCAAACCGGCGATTATACACTTAATGGTGTATTTACTCAAATTGGTGATTTCATCTCAATGGTATTGCT  
721 CGTGTAACCTCGTGACATTATTGCCGCTGGCCAGATAATGACCGAAGGCGGCGAGCTTATTTCTAAGAGC  
722 GCCTCAACTTCTCACCTTCGTTTCTTTGATGGTGATGATCGTGAACGTGGTATTATCTTTTCTCCAAATA  
723 ATGCGGGTCTTACCAATCAAGTAGTTAATATTCGCGTCCAAGATTACGCTGCAGGAAGTGAAAGCACCT  
724 ACGCGTTTTACAGCAATGGTGTATTTTCTTACCAGAAGTTTTTGGGTGGAAATCTGTATCAACTCCGG  
725 TAATTTATACCAATAAAGTTATTACTAATAAAAAGGTTAAAGGTGATTATGACATCTATTCGTTGGCTGA  
726 CAACACTCCATTTGAAGAAGGCGAAACGGCTATTAACCACCTCCGTGTTATGCGAAATGCTGTAGGAG  
727 CAGGTATTTCCACGAAGTTAATGTTAATGACGGAATAACCTGGTATTCCGGAGATGGCTTAGACACTT  
728 ATCTTTGGTCGTTTAACTGGGCCGGTGGATTGAAAGCCGGTCATTCTATTTCTGTAGGTCTTCCAGGTG  
729 GTTCTAAAGGATATTCTGAATTAGGAACTGCATCAATTGCTCTTGGTGATAATGACACCGGGTTAAAAT  
730 GGCACCAAGATGGTTATTTCTTTAGTGTAACAACGGCACAAGAAGTTTCTGAGCGGCCCTGCAGAA  
731 ACCACCAGTCTTAGAAAAATGGTTATGGGTTATTCTGTAAACGGTACCGATTAAACCACTCCTCCGTCG  
732 GAAAACATATGCTTTGGCGACGGTTGCACCTATCATGATAATAACGCGTATGGCGACGGTCAAACCTTT  
733 TTAGGTTATTATCAAGGTGGCAATTATCACCCTATTTCCGTGGTAAAGGTACTACAAACGTTAACACC  
734 GCTGGTGGTTTTGTTAGTTACTCCGGGTAATATTGATGTTGTTGGCGGTTCCGGTTAATATTGATGGCCGCA  
735 ACAATGCTTCTACACTAATGTTTCAGAGGAAATACTACAGGAAGTAGTTCAGTTGATAATATGACTATCG  
736 CCGTTTGGGGTAATACCTTTACTAATGTTGATGGTGACCGTAAAAACGTAATGGAAATATCTGATGCCA  
737 CTAGTTGGATGTGGTATATTCAGCGCAAAACCGATGACAAAGTTGAAGCCATTTAAACGGTGCCTTAC  
738 GTGTAAATGGAAGCATCGACGTCGGCAGAGAAGTTAACGTCCTCCGGCACTATTGCTGGTAATGCGGTC  
739 AATGCTCTTAGAATTTGGAACGACGACTACGGTGCCATTTTCCGCCGTTCCGGAAGGAAGTCTTCATATT  
740 ATTCCTACCGCCTTTGGCGAAGGTAAAACCTGGTGATATCGGACCACTTCGTCCATTTAGTTTGGCATT  
741 GATACTGGTAAAGGTTGTTATTCCTGACCTGGATTTGAGTCATACAACCTTTTGCTGAAAATGGTTTTATTA  
742 AATTTGGCGGTCATGGTGCAGGTGCAGGTGGTTATGATATTCAATATGCACAAGCAGCTCCTATTTTCC  
743 AAGAAATTGATGATGACGCAGTAAGTAAATATTATCCTATTGTTAAGCAGAAATTCTTACAAGGAAAAG  
744 CTGTTTGGTCTTTAGGTAAGTAAATTTCCGGGACTTTTGTGTTTGCATCATTACAAAGAAGACGGGA  
745 CCCAAGGTCATACATCAAGATTTAATGCTGATGGTACAGTTAATTTCCCGGATAACGTACAGGTCCGGTG  
746 GTGGTGAAGCTACTATTGCTAGAAATGGTAATATTTTCTCTGATATTTGGAACGGATTTAATGGTGCAGG  
747 TAATATAACTAACATTCGCGATGCCATTGCTACTCGTGTCTTAAAGAAGGTGACACGATGACAGGCAA  
748 ATTAATCGTTAAAAGAGGCTCTGACGCTATTAACATTGCTGCCGATGAAAATGATTCTGCTTATTTACTT  
749 GGAACATCGGGTGGAGCGAATTCGTGGTACATCGGTAAAGGCGGAGCAGATGACTGCTTCATTTTA  
750 TAATTTCAAACACTACCGCAGGAATTACTCTTAATAGTGTAGGCGATATTGATTTAATGTTAAAAAACAA  
751 TCTACTGCAGCTTCATTAATTTTATCGTTTATATTTAAACGGAAGACAGTGGACAGCTACTCAAGGCC  
752 ACGGATATAATAATCAATGGCAAACAGAAGCCCCATTCTTCGTTGACTTTGGTGAATCTGTTCCGAAAG  
753 ATAGTTATATGCCAATTATCAAAGGAAAAAGCCAAATCATTAAACGAAGGATATGCCACAAAGGCAGATT  
754 TTGGTATTATTAGATTGGGCGGAGATGCTACTTGGGGAAATGCAGTAATTCGTGTTGGTTCTGCGGAAA  
755 GTGGAGATAGCAGTCATCCTAATGCAATATTTGTGTTTTCAGGCTAATGGCGATTTTAAAGCTCCGGCTG  
756 GTCTTCGCGCTGGTGTAACTTGGGTGTCGGTACAATTCCAGCATGGGGCGGAGCATCTATCGCCATTG  
757 GAGACGATGACACCGGCTTGGTCCATGGCGGTGACGGCCGAATTAATATGTATGCCAATAGTATGCATA  
758 TTGCAAGCTGGGGAGCTGGTTACCATATCCATGAAGGTCTTTGGGATACCACTGGTGCCTTGTGGACT  
759 GAAACAGGAAGAGCTATTATTTCTTTTGGTCATTTAGTCCAACAAAACGATAGCTATTCAACATTTGTT  
760 CGTGACGTTTATGTTCTGATATTCGTGTTAAAAAAGACCTTGTTAAATTTGAAAATGCTTCACAG  
761 ACATTTCAAAAATTAACGGTTACACTTATATGCAGAAACGTGGCCTGGATGAAGAAGGTAATCAGAA  
762 ATGGGAACCTAATGCCGGTTTAATTGCTCAAGAAGTTCAAGCTATTTTACCTGAATTGGTTGAAGCGA

763 CCCTGACGGTGAAGCTTTACTTTCGTTTAAACTATAACGGTGTAATTGGTTTAAATACAGCTGCAATCAA  
764 TGAGCACACTGCAGAAATAGCAGAATTGAAATCAGAGATTGAAGAACTTAAAGCACTAATTAATCAT  
765 TGTTAAAATAA  
766  
767 **WQE1**  
768  
769 ATGGCTACTTTAAAGCAAATCCAATTTAAAAGAAGTAAAGTAGCCGGTGTACGTCCGGCACCGGCCA  
770 GTTGGCTGAAGGCGAACTGGCTATTAAGGACCGTTTACTTTTACTAAAGACGATACTGGAG  
771 CGATTATCGACCTTGGCTTTGCTAAGGGTGGAAATATCGATGGTAATGTTATTCATAAAGGCAATTACAA  
772 CCAAACCGGCGATTATACACTTAATGGTGTATTTACTCAAATTGGTGATTCAATCTCAATGGTATTGCT  
773 CGTGTAACCTCGTGACATTATTGCCGCTGGCCAGATAATGACCGAAGGCGGCGAGCTTATTTCTAAGAGC  
774 GCCTCAACTTCTCACCTTCGTTTCTTTGATGGTGTATGATCGTGAACGTGGTATTATCTTTCTCAAATA  
775 ATGCGGGTCTTACCAATCAAGTAGTTAATATTCCGCTCCAAGATTACGCTGCAGGAAGTGAAAGCACCT  
776 ACGCGTTTTAGGCAATGGTGTATTTTCTTACCAGAAGTTTTTGGGTGGAAATCTGTATCAACTCCGG  
777 TAATTTATACCAATAAAGTTATTACTAATAAAAAGGTTAAAGGTGATTATGACATCTATTTCGTTGGCTGA  
778 CAACACTCCATTTGAAGAAGGCGAAACGGCTATTAACCACTCCGTTATGCGAAATGCTGTAGGAG  
779 CAGGTATTTCCACGAAGTTAATGTTAATGACGGAATAACCTGGTATTCCGGAGATGGCTTAGACACTT  
780 ATCTTTGGTCGTTTAACTGGGCCGGTGGATTGAAAACCGGTCATTCTATTTCTGTAGGTCTTCCAGGTG  
781 GTTCTAAAGGATATTCTGAATTAGGAAGTGCATCAATTGCTCTTGGTGATAATGACACCGGGTTAAAAT  
782 GGCACCAAGATGGTTATTTCTTTAGTGTAACAACGGCACAAGAAGTTTCTGAGCGGCCCTGCAGAA  
783 ACCACCAGTCTTAGAAAAATGGTTATGGGTATTCTGTAAACGGTACCGATTAAACCACTCCTCCGTCG  
784 GAAAACCTATGCTTTGGCGACGGTTGCACTTATCATGATAATAACGCGTATGGCGACGGTCAAACCTT  
785 TTAGGTTATTATCAAGGTGGCAATTATCACCCTATTTCCGTTGGTAAAGGTTACTACAAACGTTAACACC  
786 GCTGGTGGTTTTGTTAGTTACTCCGGTAATATTGATGTTGTTGGCGGTTCCGTTAATATTGATGGCCGCA  
787 ACAATGCTTCTACACTAATGTTTCAGAGGAAATACTACAGGAAGTAGTTCAGTTGATAATATGACTATCG  
788 CCGTTTGGGGTAATACCTTTACTAATGTTGATGGTGACCGTAAAAACGTAATGGAAATATCTGATGCCA  
789 CTAGTTGGATGTGGTATATTACGCGAAAACCGATGACAAAGTTGAAGCCATTTAAACGGTGCCTTAC  
790 GTGTAAATGGAAGCATCGACGTCGGCAGAGAAGTTAACGTCCTCCGGCACTATTGCTGGTAATGCGGTC  
791 AATGCTCTTAGAATTTGGAACGACGACTACGGTGCCATTTCCGCCGTTCCGAAGGAAGTCTTCATATT  
792 ATTCCTACCGCCTTTGGCGAAGGTAAAACCTGGTGTATCGGACCACTTCGTCCATTTAGTTTGGCATT  
793 GATACTGGTAAGGTTGTTATTCCTGACCTGGATTTGAGTCATACAACCTTTTGTGAAAATGGTTTTATTA  
794 AATTTGGCGGTCATGGTGCAGGTGCAGGTGGTTATGATATTCAATATGCACAAGCAGCTCCTATTTTCC  
795 AAGAAATTGATGATGACGCAGTAAGTAAATATTATCCTATTGTTAAGCAGAAATCTTACAAGGAAAAAG  
796 CTGTTTGGTCTTTAGGTACTGAAATTAATCCGGGACTTTTGTGTTTGCATCATTACAAAGAAGACGGGA  
797 CCCAAGTCCATACATCAAGATTTAATGCTGATGGTACAGTTAATTTCCCGGATAACGTACAGGTCCGGT  
798 GTGGTGAAGCTACTATTGCTAGAAATGGTAATATTTTCTCTGATATTTGGAACGGATTTAATGGTGCAGG  
799 TAATATAACTAACATTCGCGATGCCATTGCTACTCGTGTCTTAAAGAAGGTGACACGATGACAGGCCG  
800 CTTAACTCTTAAAACCAACTCAGATGCCGTGGTTATTGATTATCCAGCAGATGAAGCAGGTTATGTTAA  
801 GGGTAAAAAAGGTGGTGTGATAACTGGTATGTAGGTAATGGTGGTGTGATGACACTGCTTCATTTTA  
802 TAATTTCAAACCTACCGCAGGAATTACTCTTAATAGTGTAGGCGATATTGATTTAATGTTAAAAAACAA  
803 TCTACTGCAGCTTCATTAATTTTTATCGTTTATATTTAAACGGAAGACAGTGGACAGCTACTCAAGGCC  
804 ACGGATATAATAATCAATGGCAAACAGAAGCCCCATCTTCGTTGACTTTGGTGAATCTGTTCCGAAAG  
805 ATAGTTATATGCCAATTATCAAAGGAAAAAGCCAAATCATTAAACGAAGGATATGCCACAAAGGCAGATT  
806 TTGGTATTATTAGATTGGGCGGAGATGCTACTTGGGGAAATGCAGTAATTCGTGTTGGTTCTGCGGAAA

807 GTGGAGATAGCAGTCATCCTAATGCAATATTTGTGTTTCAGGCTAATGGCGATTTTAAAGCTCCGGCTG  
808 GTCTTCGCGCTGGTGTAACTTGGGTGTCCGTACAATTCAGCATGGGGCGGAGCATCTATCGCCATTG  
809 GGGACGATGACACCGGCTTGGTCCATGGCGGTGACGGCCGAATTAATATGTATGCCAATAGTATGCATA  
810 TTGCAAGCTGGGGAGCTGGTTACCATATCCATGAAGGTCCTTTGGGATACCACTGGTGCCTTGTGGACT  
811 GAAACAGGAAGAGCTATTATTTCTTTTGGTCATTTAGTCCAACAAAACGATAGCTATTCAACATTTGTT  
812 CGTGACGTTTATGTTCTGTTCTGATATTCGTGTTAAAAAAGACCTTGTAAATTTGAAAATGCTTCACAG  
813 ACACTTTCAAAAATTAACGGTTACACTTATATGCAGAAACGTGGCCTGGATGAAGAAGGTAATCAGAA  
814 ATGGGAACCTAATGCCGGTTTAATTGCTCAAGAAGTTCAAGCTATTTTACCTGAATTGGTTGAAGGCGA  
815 CCCTGACGGTGAAGCTTTACTTCGTTTAAACTATAACGGTGTAATTGGTTTAAATACAGCTGCAATCAA  
816 TGAGCACACTGCAGAAATAGCAGAATTGAAATCAGAGATTGAAGAACTTAAAGCACTAATTAATCAT  
817 TGTTAAAATAA

818

819 **WQT1**

820 ATGGCTACTTTAAAGCAAATCCAATTTAAAAGAAGTAAAGTAGCCGGTGTACGTCCGGCACCGGCCA  
821 GTTGGCTGAAGGCGAACTGGCTATTAAGTAAAGGACCGTTTACTTTTACTAAAGACGATACTGGAG  
822 CGATTATCGACCTTGGCTTTGCTAAGGGTGGAAATATCGATGGTAATGTTATTTCATAAAGGCAATTACAA  
823 CCAAACCGGTAATTATAATCTGTCTGGTACTTTTACCCAAACAGGTAGTTATACGACATCCGGAAGTATA  
824 ACAGCAAATGGTGATATTACTGCAAAATCTCGCCTAATGACGGATATGGGCGAAGTTTGGTACGTGGC  
825 AATGGTACCGCACATGTTTCGATTCCAGGATTTAGCTGATGCGCGGAAAGAGCTATAATTTATTCTCAA  
826 AACCGTACTGGGGATACCAAGCAAATCTTGAACGTTCTGTGTTTCAGGATTACACTAATTCGACATCTAAT  
827 ATTTTTGCATTCAACGGCGACGGTTTATTTTATGCTCCGTCTATTTCCGCCGGAACATCAGTAAATCTC  
828 CGGTAATTTATACTAATACTGTTAATACAGACAGTAAGAATATTGGCGATTATGATATATCTTCATTAGCA  
829 AATAATAATCTGCCACGGATAAAAACCTATTTGCGCGTTGTACGTACCGACCCAGCGTCTGCAAACTT  
830 CATGAAATTTGTGAAAATAACGGTATCAGTTGGTATTCTGGTTCAACCCCTACTGATTATATGTTGTCTT  
831 TTGCTTATCCGGTGGTTTTCAAGCAGGTCATTTCGATTGCAGTAGGTATGGAATCAGGGCCTTTGACATA  
832 TTCAACCTTAGGTAAAGGTTCTATTGTTCTTGGTGATAATGATAACCGGTTTAAATGGAAACAAGACGG  
833 CCTGTTCTATAAATAATAATGGAGCTTATACTTTACTTACAACCTCAACTGAAGTTACAAGCCTTAAA  
834 CAGTTAGTTGCGGGTTATTCAACCAACGGTCTGATTTAATTCTTCTACAACCTCAAAACTATCCATTAG  
835 TTATTGTTAATACTACTAATGATAAAAACAGCTTCGGCGACGGTCAAACCTTTTTAGGTTATCACCAGA  
836 GCGGCAAATATCACCATTATTTTCGTGGCAAAGGTGTAACAAACGTTAACACCGCCGGCGGGTTGTTG  
837 GTTACTCCTGGTAACGTTGAAGTCCGGGGCGGTTCCGGTTAATATTGATGGTCTCAGTAATGCTTCTACA  
838 GTGCTTTTTAAAGGAAATACTACAGGATATAGTTCAGTCGATAATATAGAGCTCAAAGTTTGGGGTGAC  
839 ACTTTTAATACGGTAGGTGGTTCTCGTAAAAACGTAATGGAAACATCTGATGCTACTGGCTGGATGCAT  
840 TATATTCAACGAACTACAGAAGGTAAAGTCGAATCCTATTTAAATGGTACCATGAATGTAATTGAAGGA  
841 TTGACTGTCAATCAAGATACATCCTTAAAACGTAATCTGTATGTTCCAATGAAATTAAGTTCGCGCTG  
842 CTAGTGGTCTTCGTATTTGGAACGATAAGTATGGTGTATTTTTCGAAATTCGGAAGACCAACTGCATAT  
843 TATCCGACCAATGCCAATGCCGGCGAAAGTGGTGGATTGGGCCATTACGACCGTTAAGTATTACATT  
844 AGACACCGGCATAGTTAAAATTCCTAACTTAGCAGCCAACCAGGTTTCTTTTAGTAGCACAGGTGTATT  
845 GGAATTCATCGCCGGTAACGGTTCATCTTATGCTAACCAGAACAACACTAAAGCTCCATTGTATCAAAC  
846 GCTTGGTTCTGCGACTCAAGCATTCTATCCTATTAAGCAGAAAAATACAGTTTCTAACGTAACCTGTT  
847 ACTCAAGGTATGGACCGAGCTACGAGCGAATACCGAATTGTTGCTCAAGGTGATTTGCTTGGTGATGG  
848 TGATGCTACAGGATTGCAATACTGGCGATTTACCAAGAAGGTAACCTTATAACTCGGAACCGCTTATA  
849 TGCCGGTACAGCTTTCATGAATACCGATGGTAATATTGCAGGTTCTATTTGGAACAAGTATAGCGGTGCT  
850 ACTAACCTTGATGCTGCAGTGAATACTCGTGTTGGTAAAGGCGGGCGATAAATGACTGGCAAATTAATC

851 GTTAAAAGAGGCTCTGACGCTATTAACATTGCTGCCGATGAAAATGATTCTGCTTATTTACTTGGAACA  
852 TCGGGTGGAGCGAATTCGTGGTACATCGGTAAAGGCGGAGCAGATGACACTGCTTCATTTTATAATTC  
853 AAAACTACCGCAGGAATTACTCTTAATAGTGTAGGCGATATTGATTTAATGTTAAAAACAATCTACTG  
854 CAGCTTCATTAATTTTTATCGTTTATATTTAAACGGAAGACAGTGGACAGCTACTCAAGGCCACGGAT  
855 ATAATAATCAATGGCAAACAGAAGCCCCATTCTTCGTTGACTTTGGTGAATCTGTTCCGAAAGATAGTT  
856 ATATGCCAATTATCAAAGGAAAAAGCCAAATCATTAAACGAAGGATATGCCACAAAGGCAGATTTTGGA  
857 TTATTAGATTGGGCGGAGATGCTACTTGGGGAAATGCAGTAATTCGTGTTGGTTCTGCGGAAAGTGGA  
858 GATAGCAGTCATCCTAATGCAATATTTGTGTTTCAGGCTAATGGCGATTTTAAAGCTCCGGCTGGTCTTC  
859 GCGCTGGTGTTAACTTGGGTGTCGGTACAATTCCAGCATGGGGCGGAGCATCTATCGCCATTGGTGATA  
860 ACGACACAGGTTTAGTCCATGGTGGTGACGGCCGAATTAATATGTATGCCAATAGTATGCATATTGCAA  
861 GCTGGGGAGCTGGTTACCATATCCATGAAGGTCCTTTGGGATACCACTGGTGCCTTGTGGACTGAAACA  
862 GGAAGAGCTATTATTTCTTTTGGTCATTTAGTCCAACAAAACGATAGCTATTCAACATTTGTTTCGTGACG  
863 TTTATGTTTCGTTCTGATATTCGTGTTAAAAAAGACCTTGTTAAATTTGAAAATGCTTCACAGACACTTC  
864 AAAAATTAACGGTTACACTTATATGCAGAAACGTGGCCTGGATGAAGAAGGTAATCAGAAATGGGAAC  
865 CTAATGCCGGTTTAATTGCTCAAGAAGTTCAAGCTATTTTACCTGAATTGGTTGAAGGCGACCCTGACG  
866 GTGAAGCTTTACTTCGTTTAAACTATAACGGTGTAAATTGGTTTAAATACAGCTGCAATCAATGAGCACA  
867 CTGCAGAAATAGCAGAATTGAAATCAGAGATTGAAGAACTTAAAGCACTAATTAATCATTGTTAAAAT  
868 AA

869

870

871 Yellow and green color: nucleic acid mutation which occurred didn't cause amino acid  
872 substitution

873 Red color: nucleic acid mutation which occurred caused amino acid substitution.

874

875

876
